# Supplementary material for: Pyrido[1,2-a]pyrimidinium ions – a novel bridgehead nitrogen heterocycles: synthesis, characterisation, and elucidation of DNA binding and cell imaging properties
Source: Royal Society of Chemistry journal article supplement (doi:10.1039/c5ob01082a), 2015-01-01

## Supporting information

### **Pyrido[1,2-a]pyrimidinium ion- a novel bridgehead nitrogen heterocycle : synthesis, characterisation, and elucidation of DNA binding and cell imaging properties**

Susanta Kumar Manna\*,<sup>a</sup> Arabinda Mandal,<sup>a</sup> Suresh Kumar Mondal,<sup>a</sup> Arup Kr Adak,<sup>a</sup> Akash Jana,<sup>a</sup> Somnath Das,<sup>c</sup> Sourav Chattopadhyay,<sup>d</sup> Somenath Roy,<sup>d</sup> Shyamal Kr Ghorai,<sup>c</sup> Shubhankar Samanta\*,<sup>a</sup> Maidul Hossain\*,<sup>c</sup> and Mahiuddin Baidya\*<sup>b</sup>

<sup>a</sup>Department of Chemistry, Haldia Government College, Haldia 721657, India

<sup>b</sup>Department of Chemistry, Indian Institute of Technology Madras, Chennai 600036, India

<sup>c</sup>Department of Chemistry and Chemical Technology, Vidyasagar University, Midnapore 721102, India

<sup>d</sup>Department of Human Physiology with Community Health, Vidyasagar University, Midnapore 721102, India.

<sup>e</sup>Department of Chemistry and Biochemistry, Presidency University, 86/1, College Street, Kolkata 700073, India

Scan copy of <sup>1</sup>H and <sup>13</sup>C NMR Spectra of all compounds (**2a-s**)

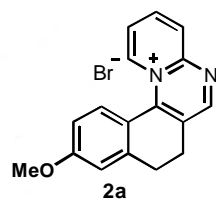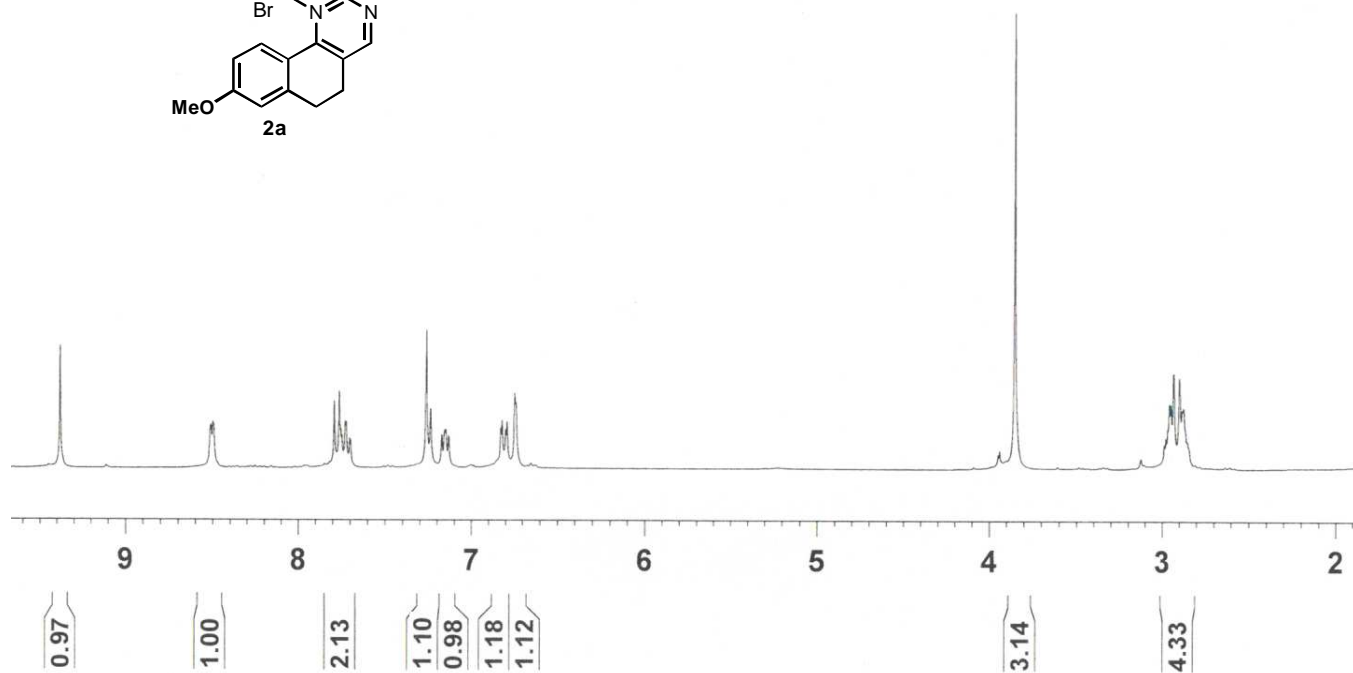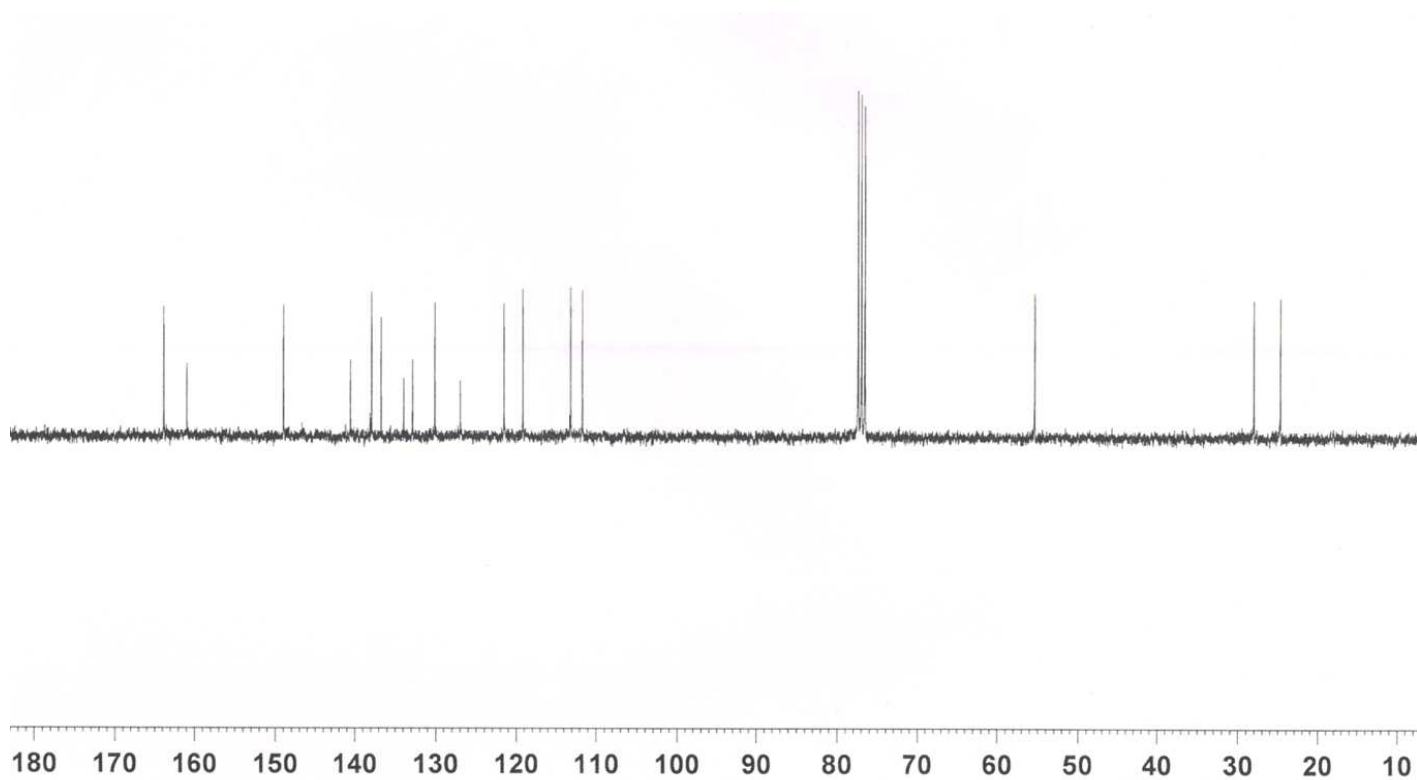

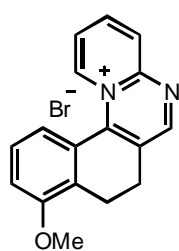

**2c**

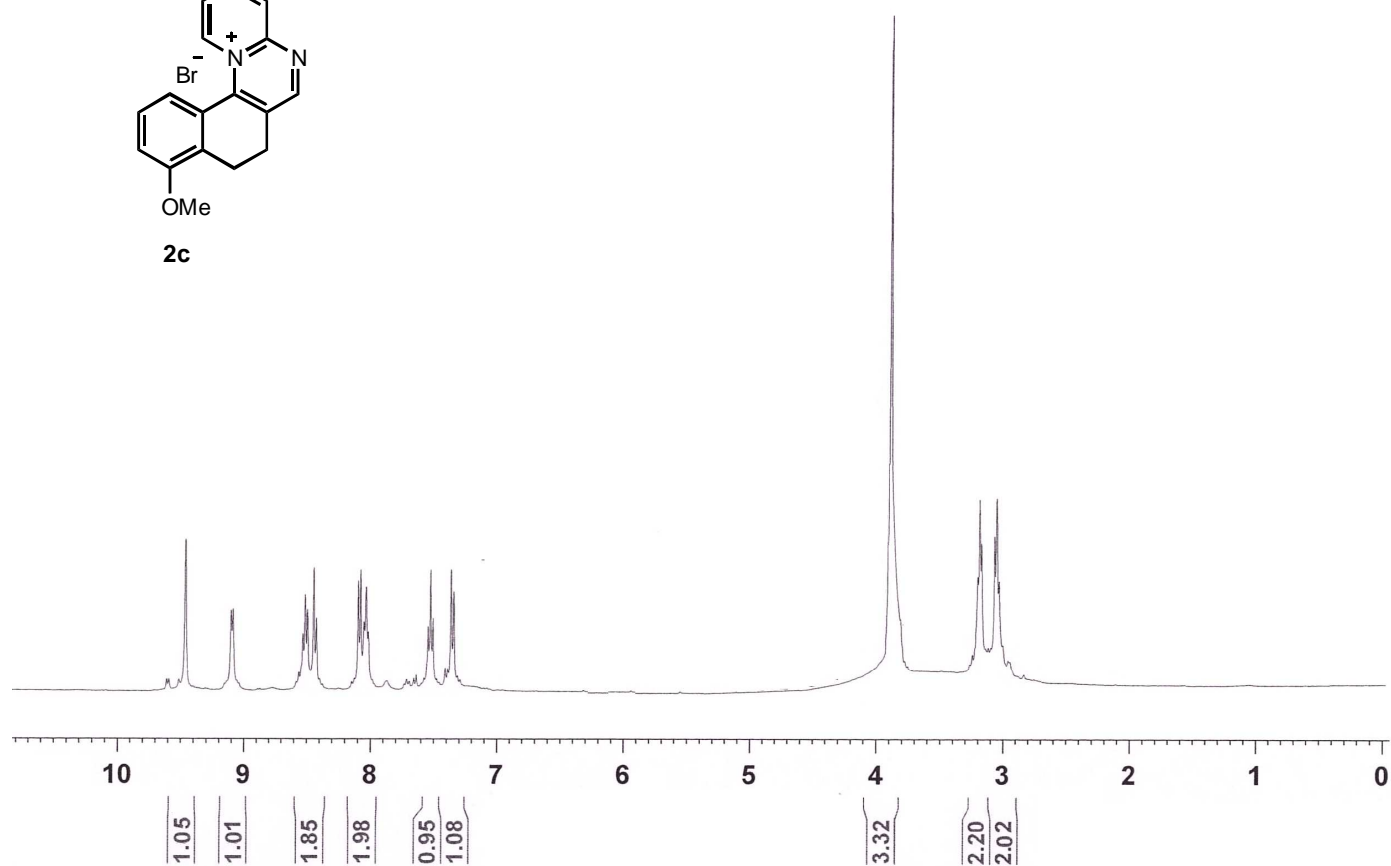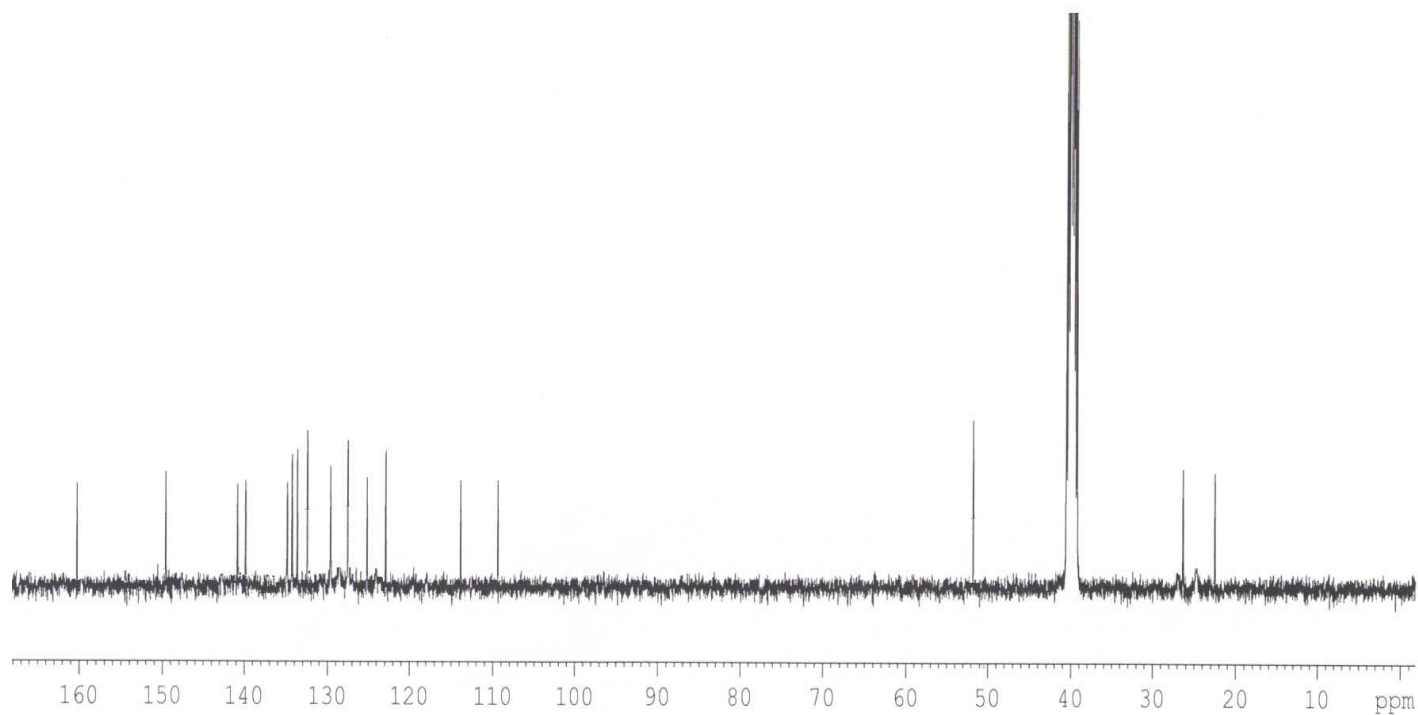

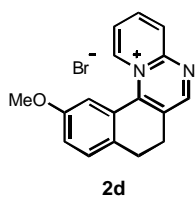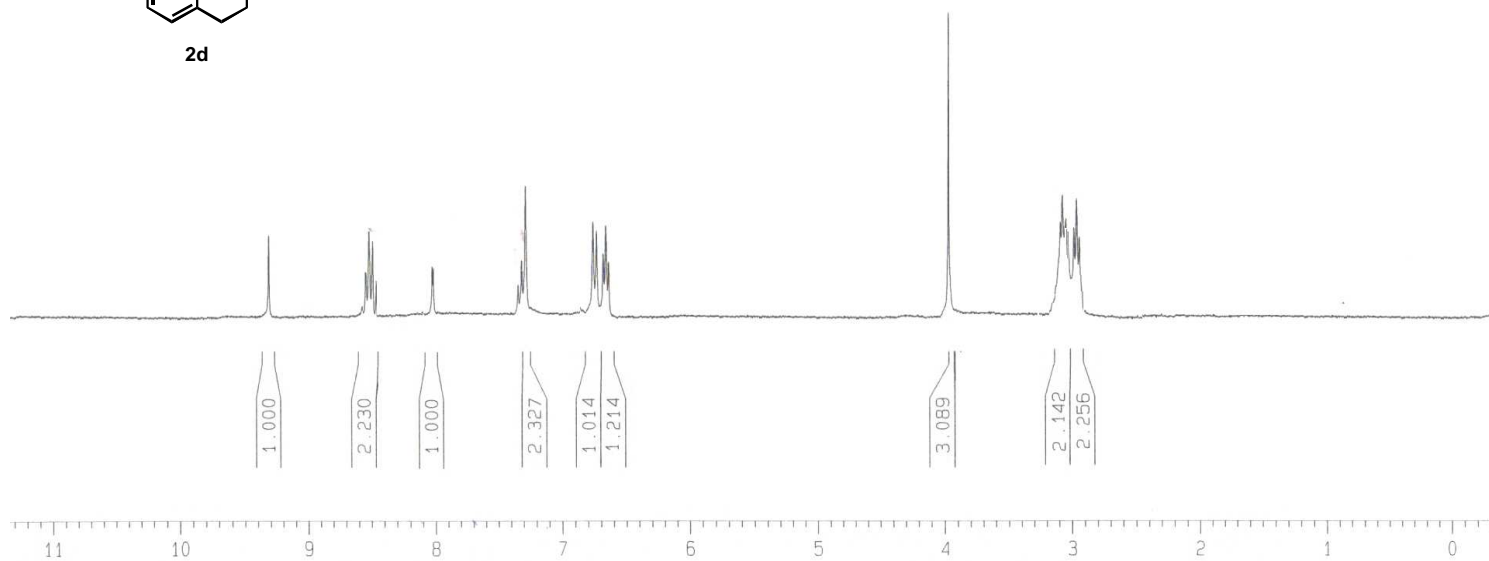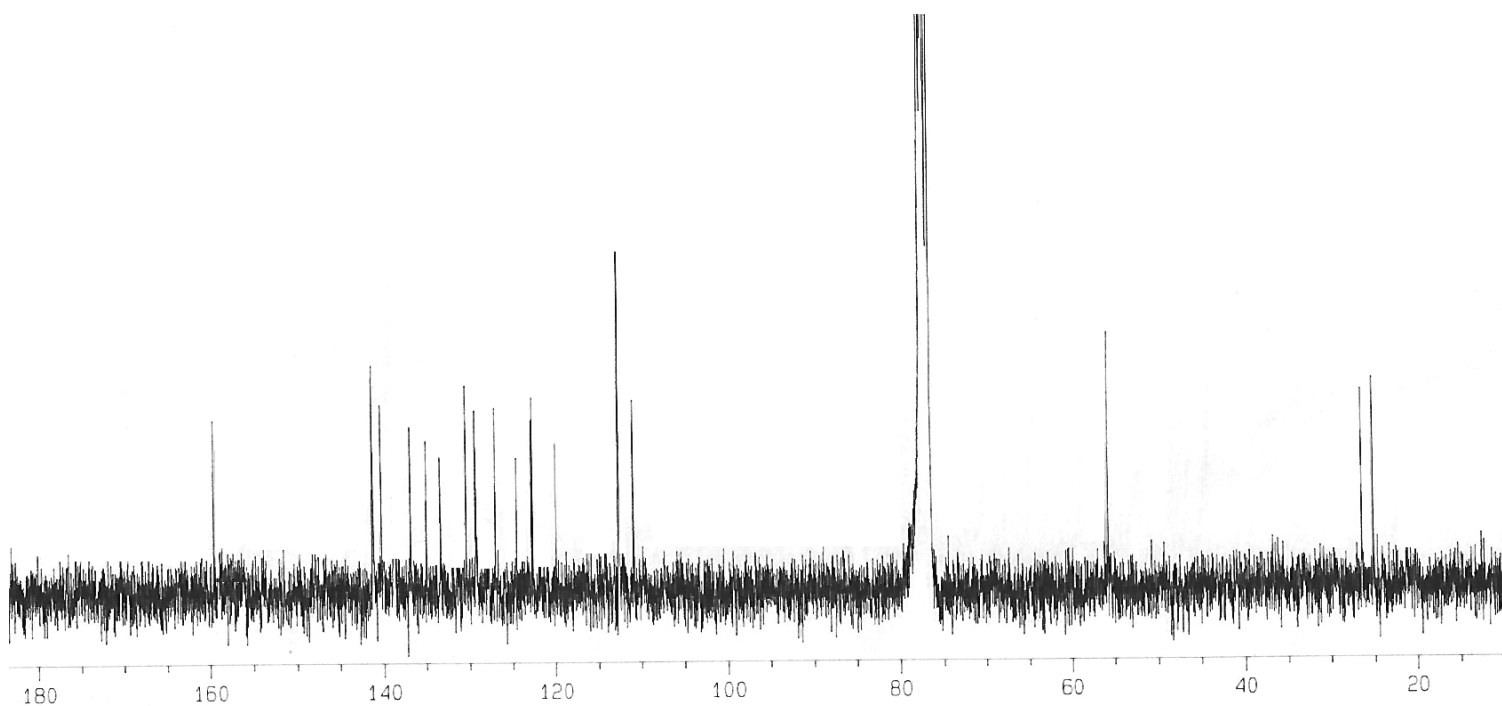

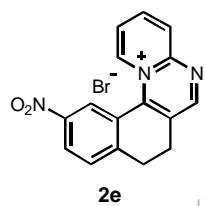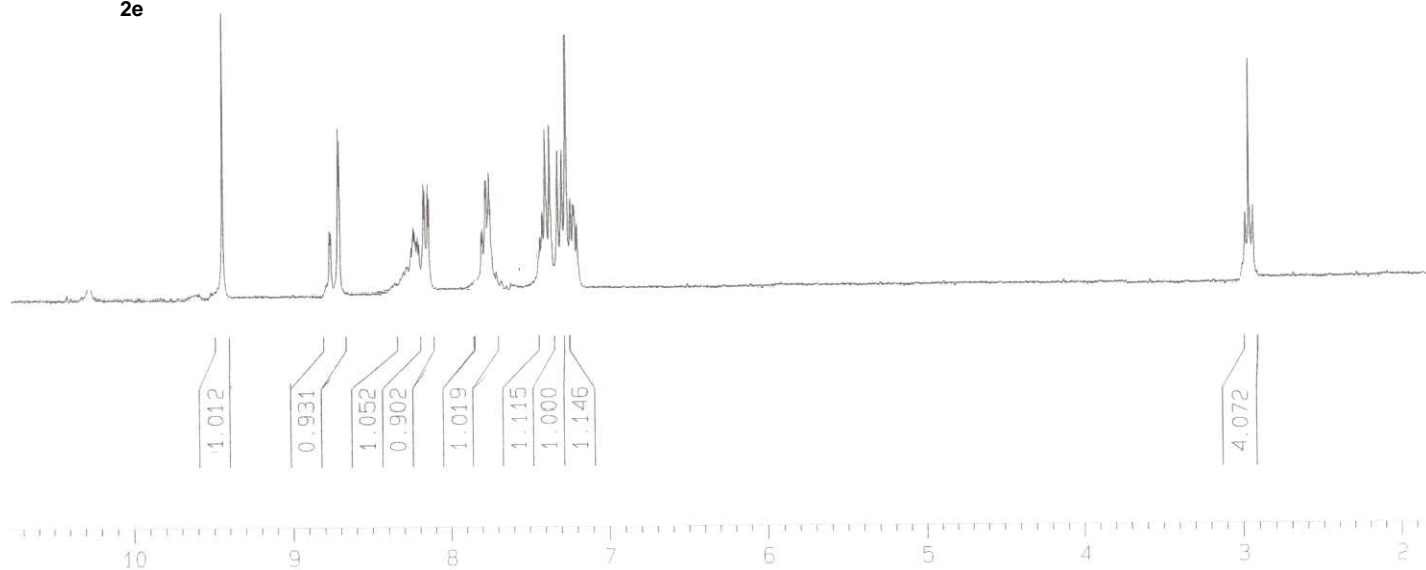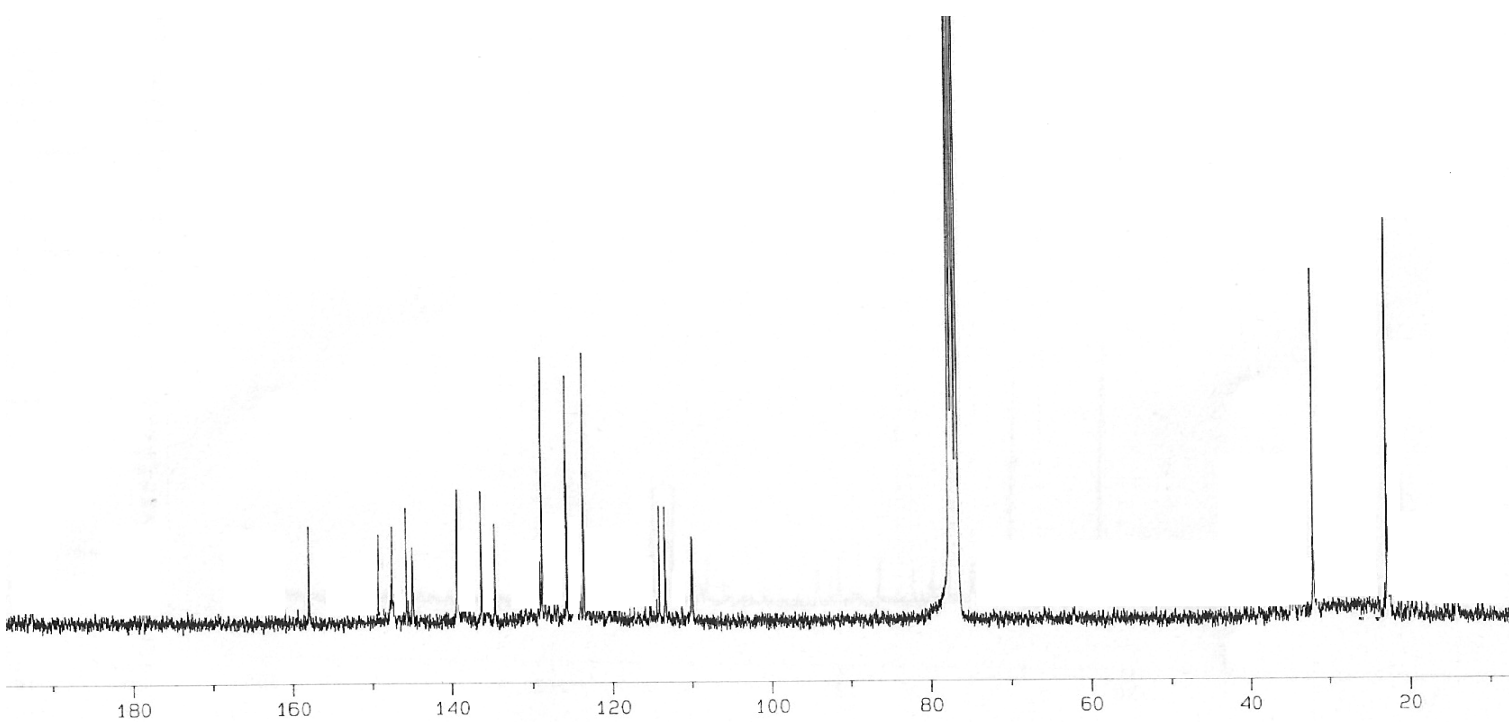

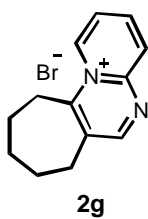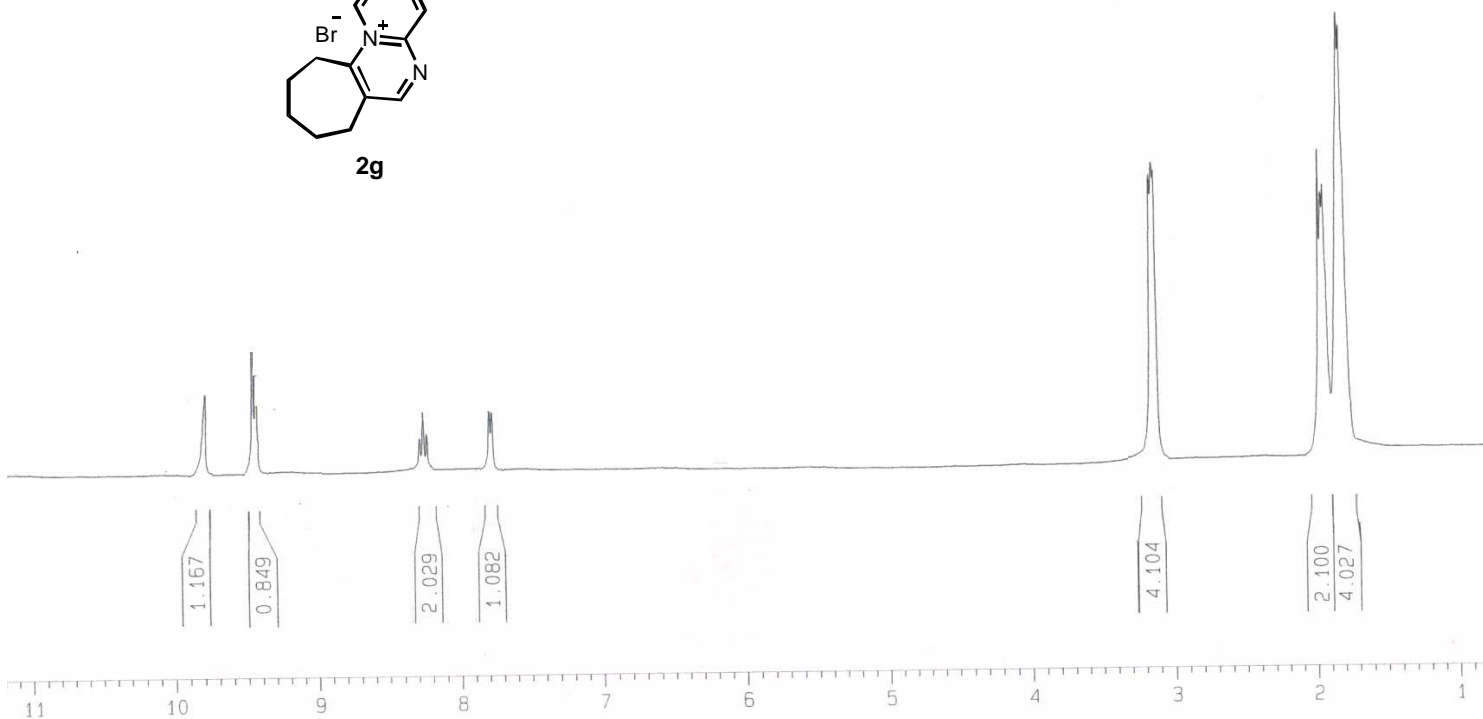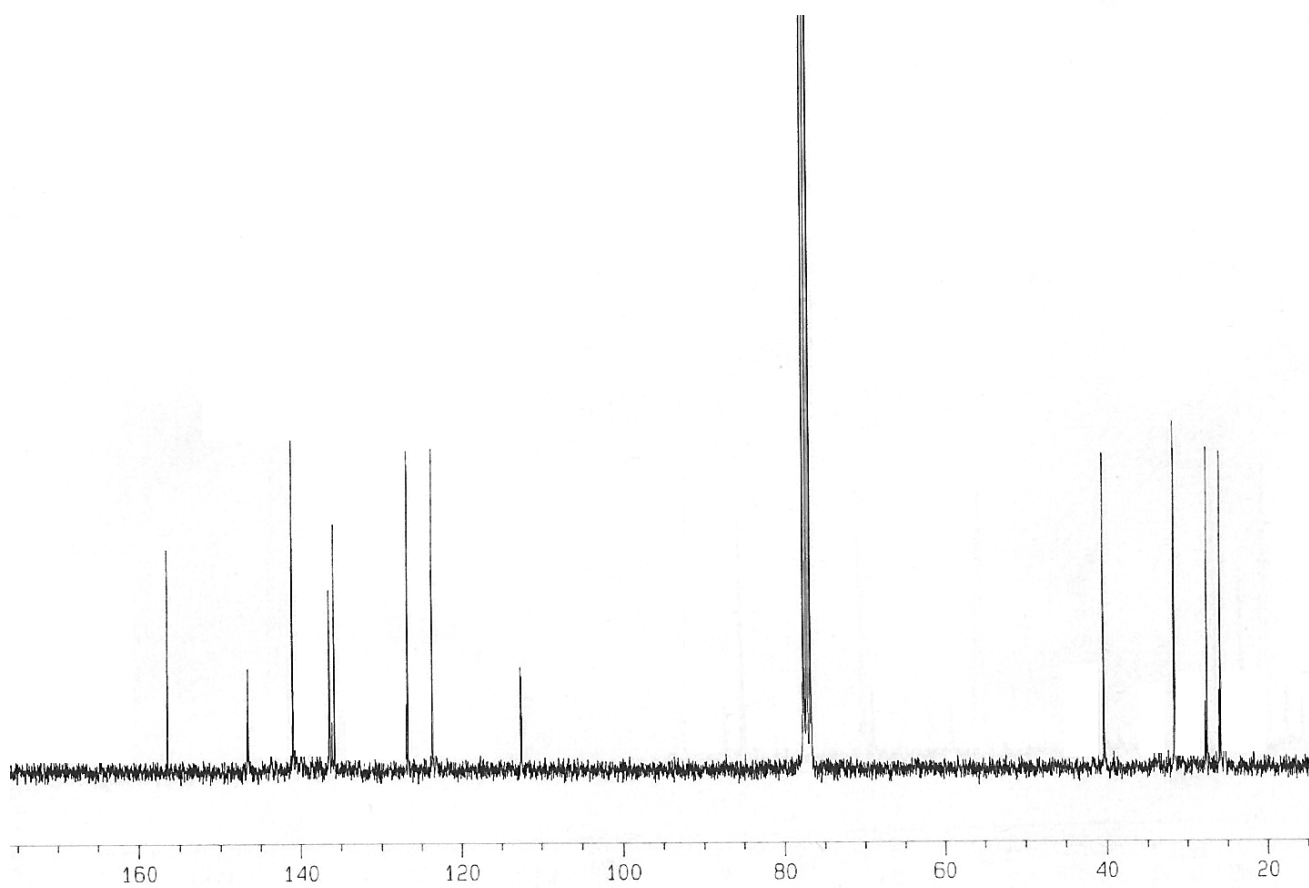

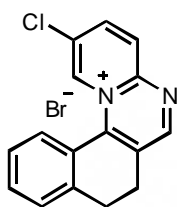

2h

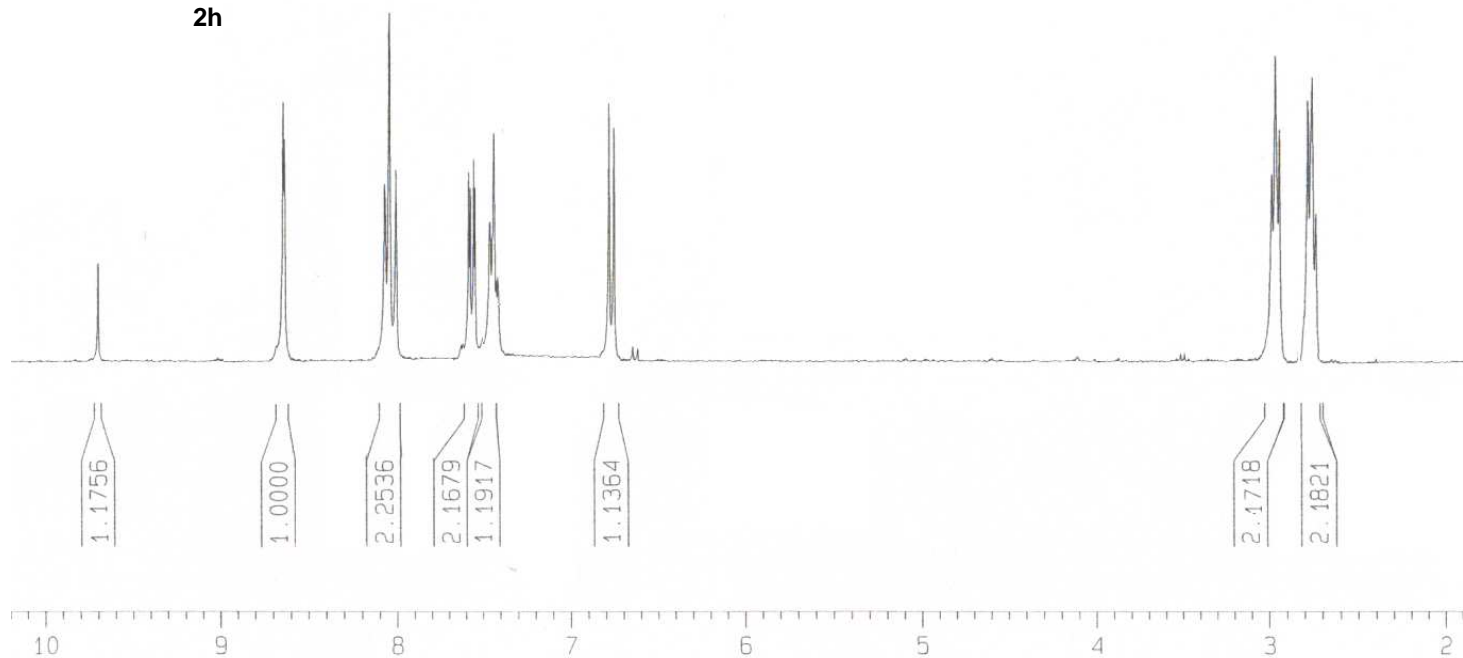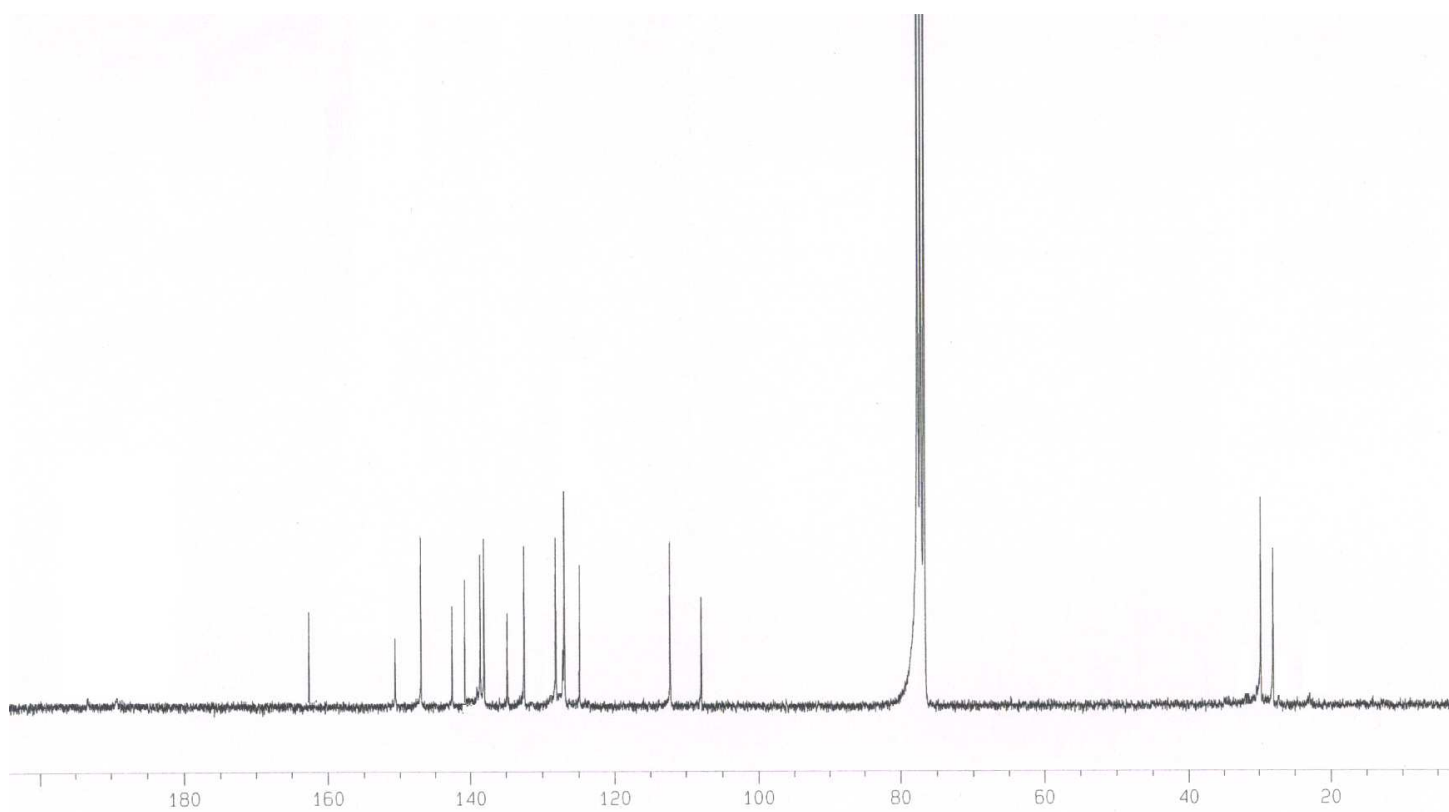

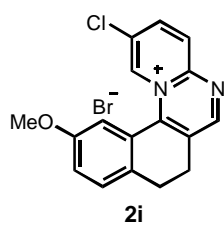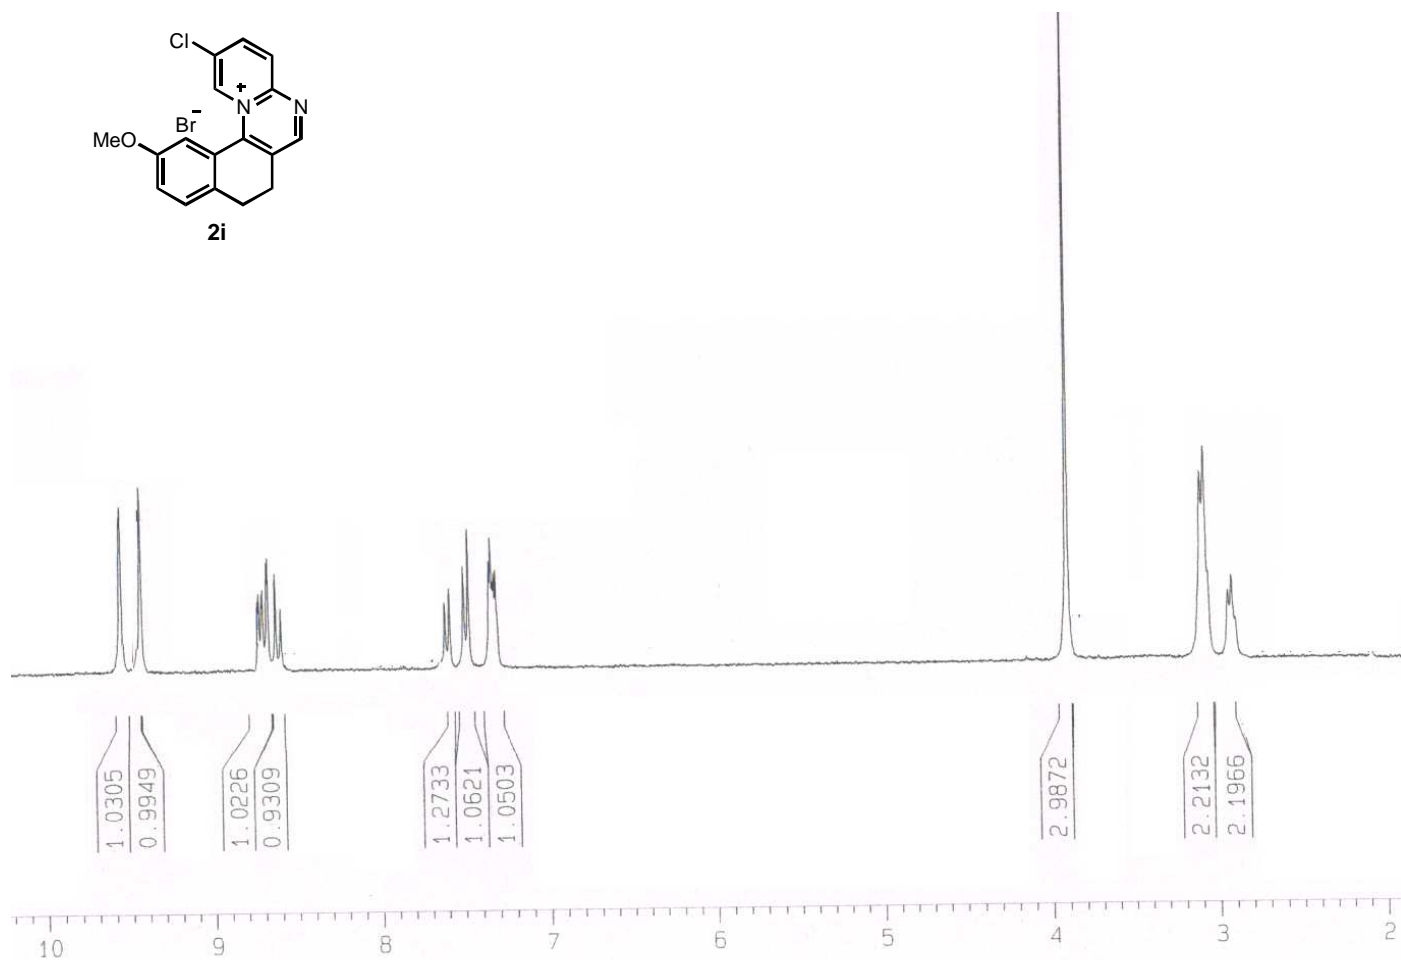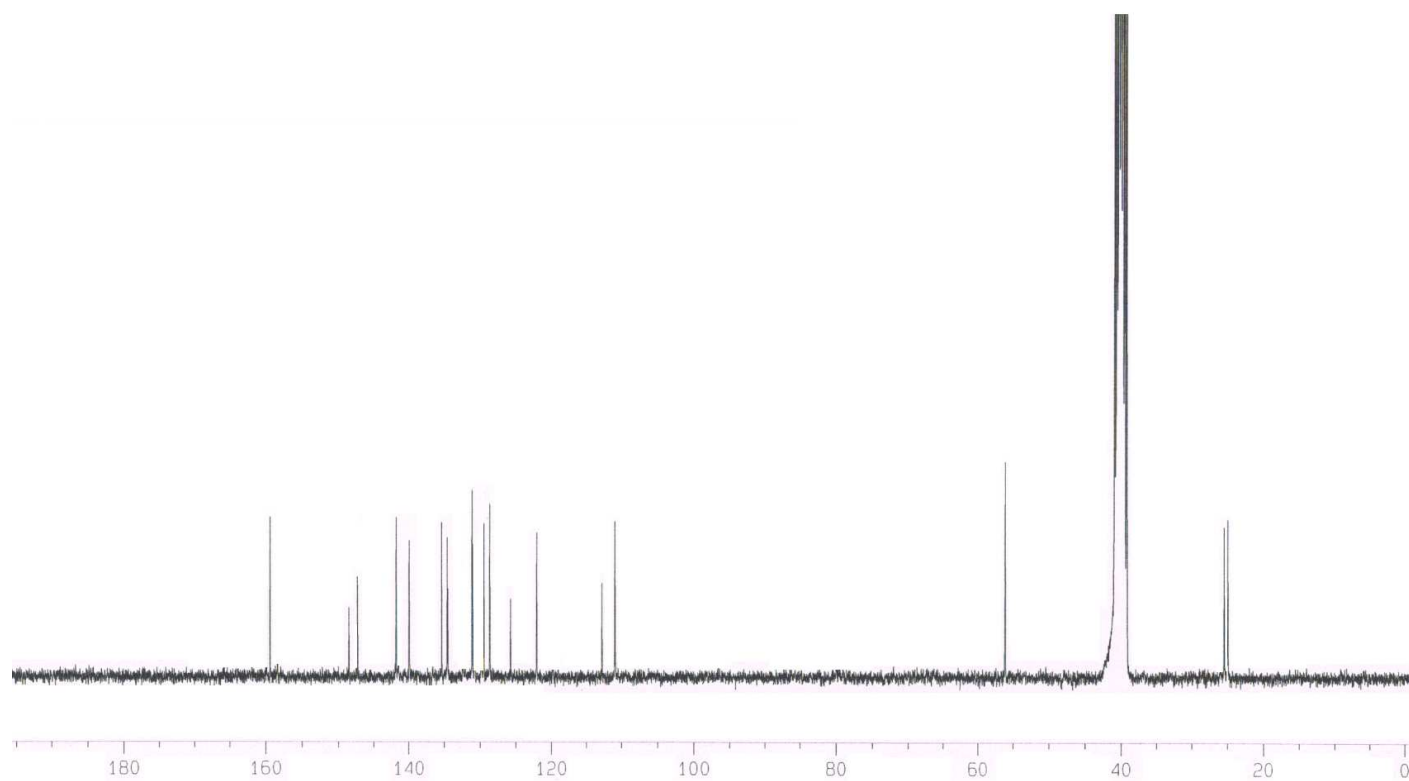



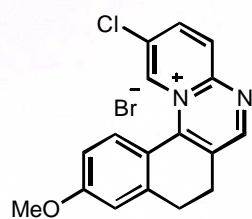

**2j**

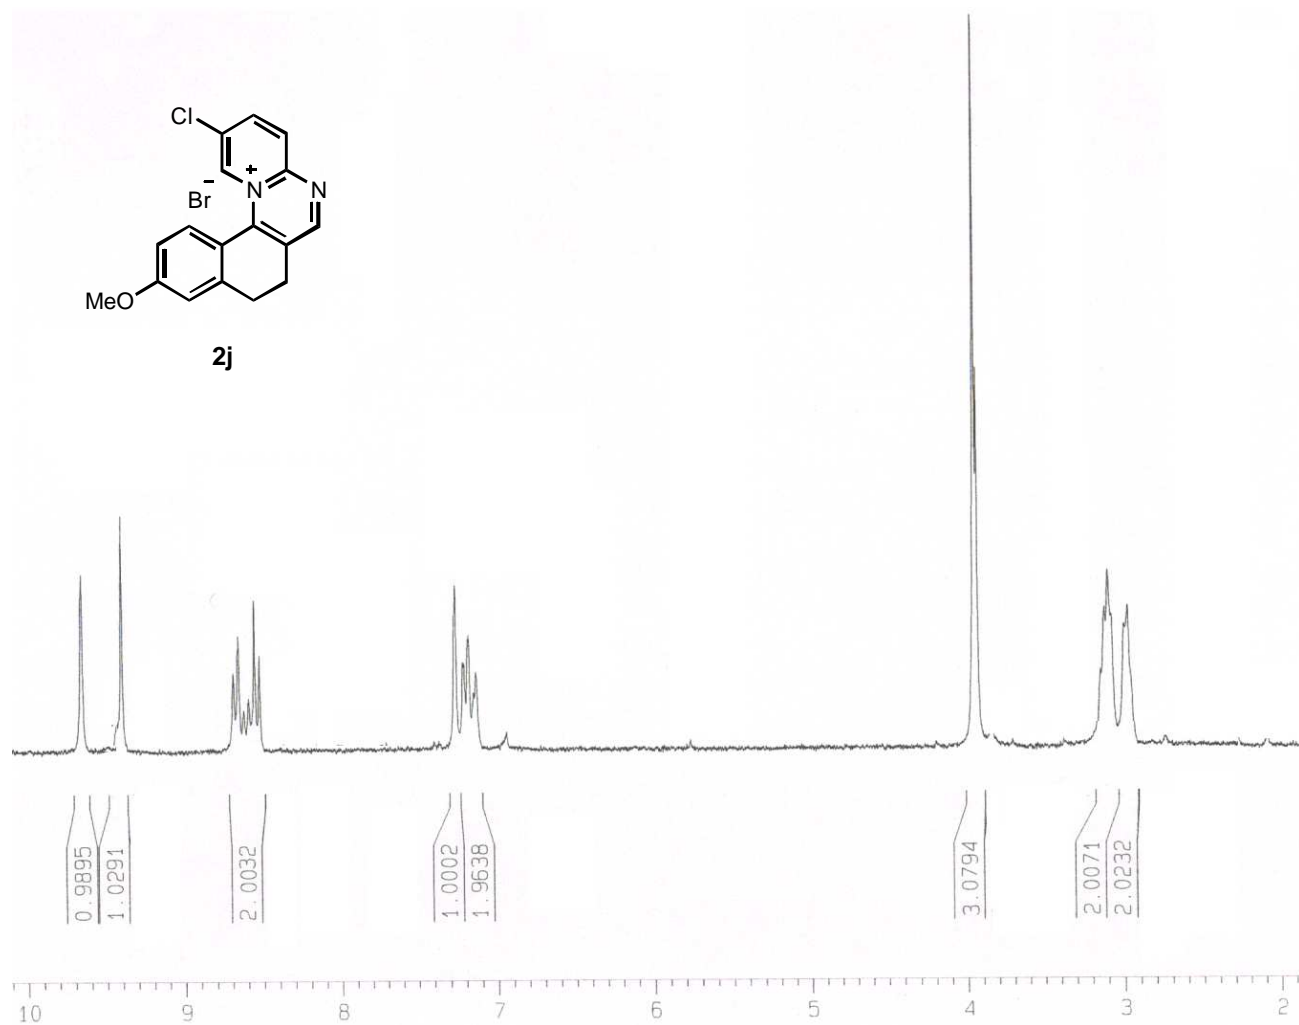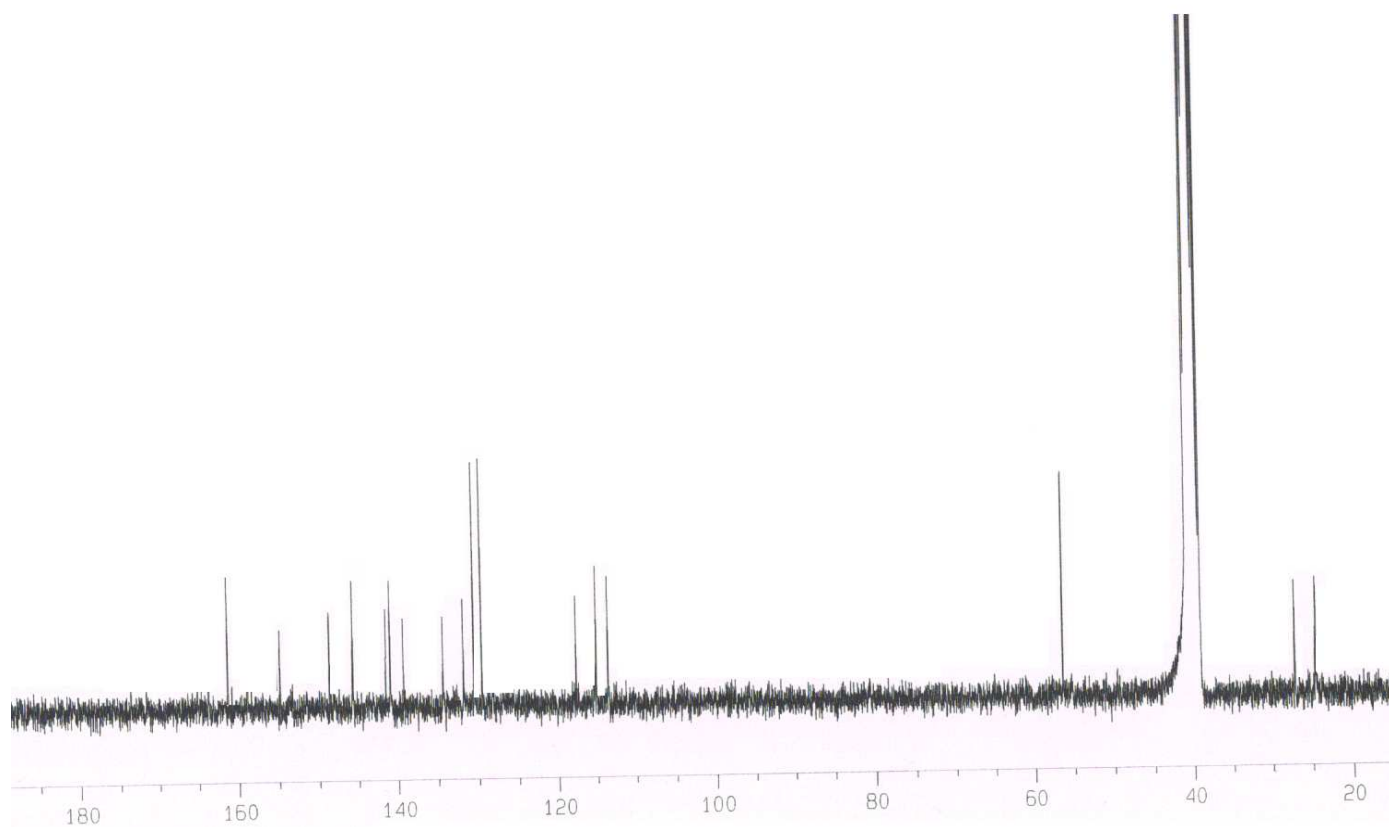

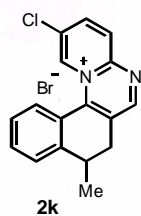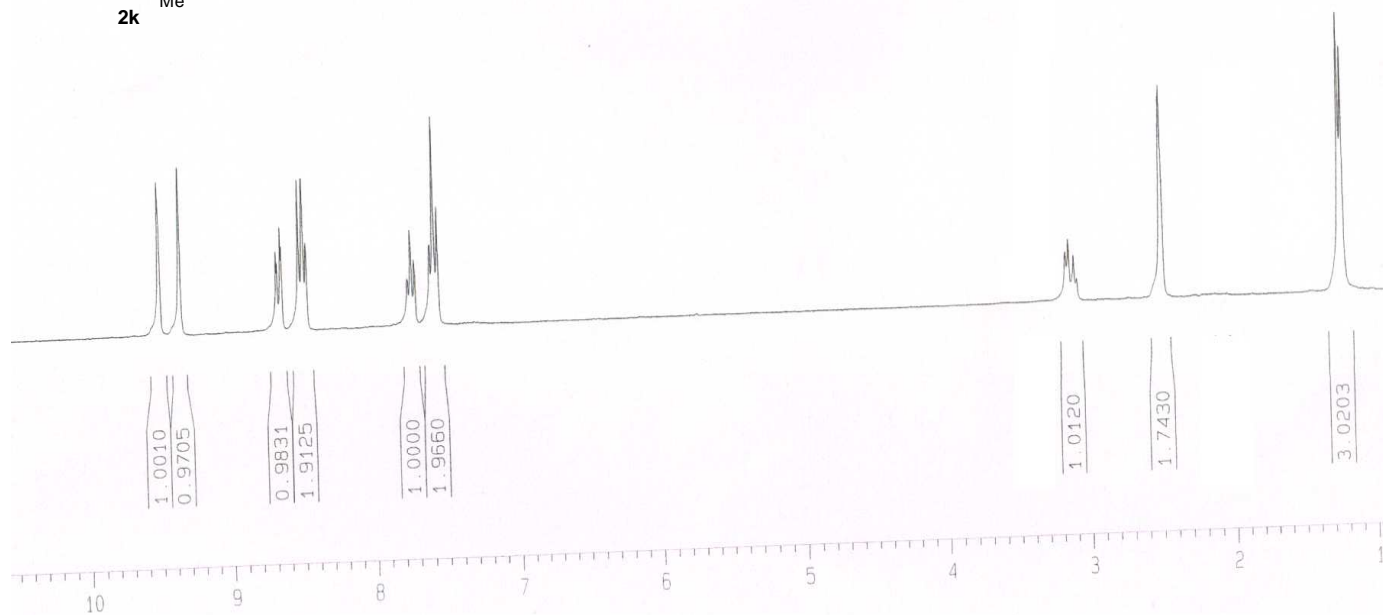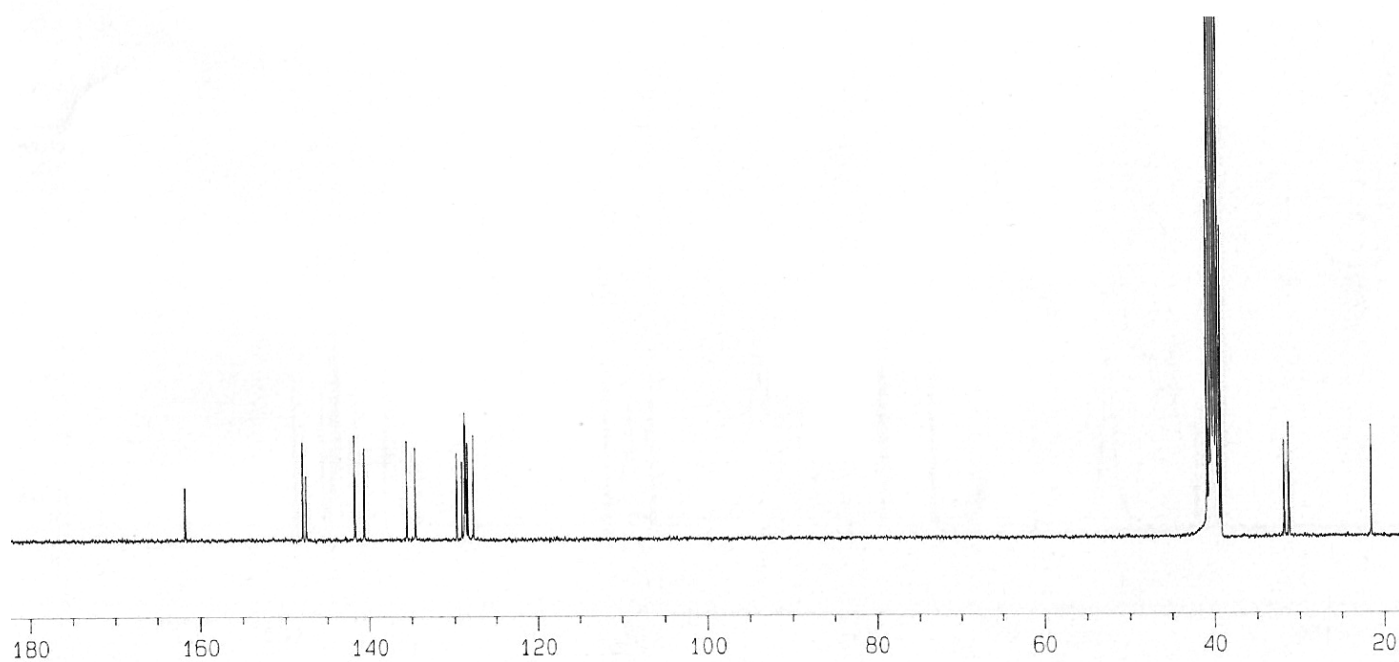

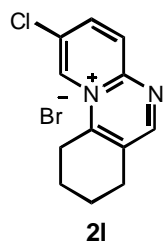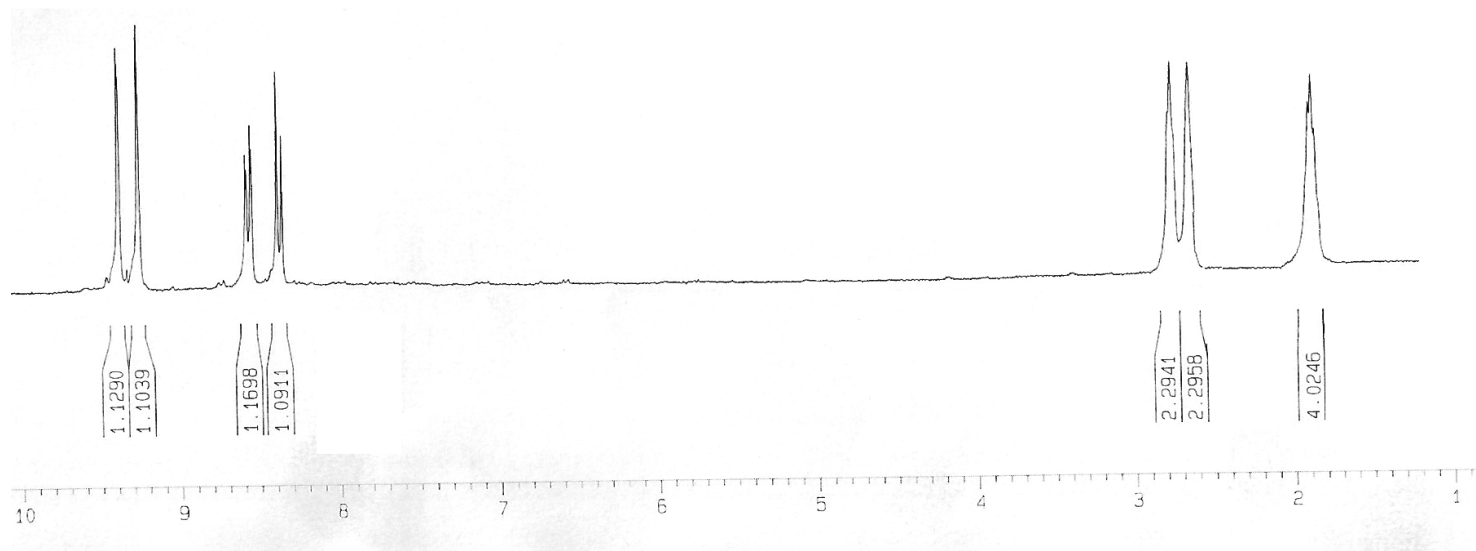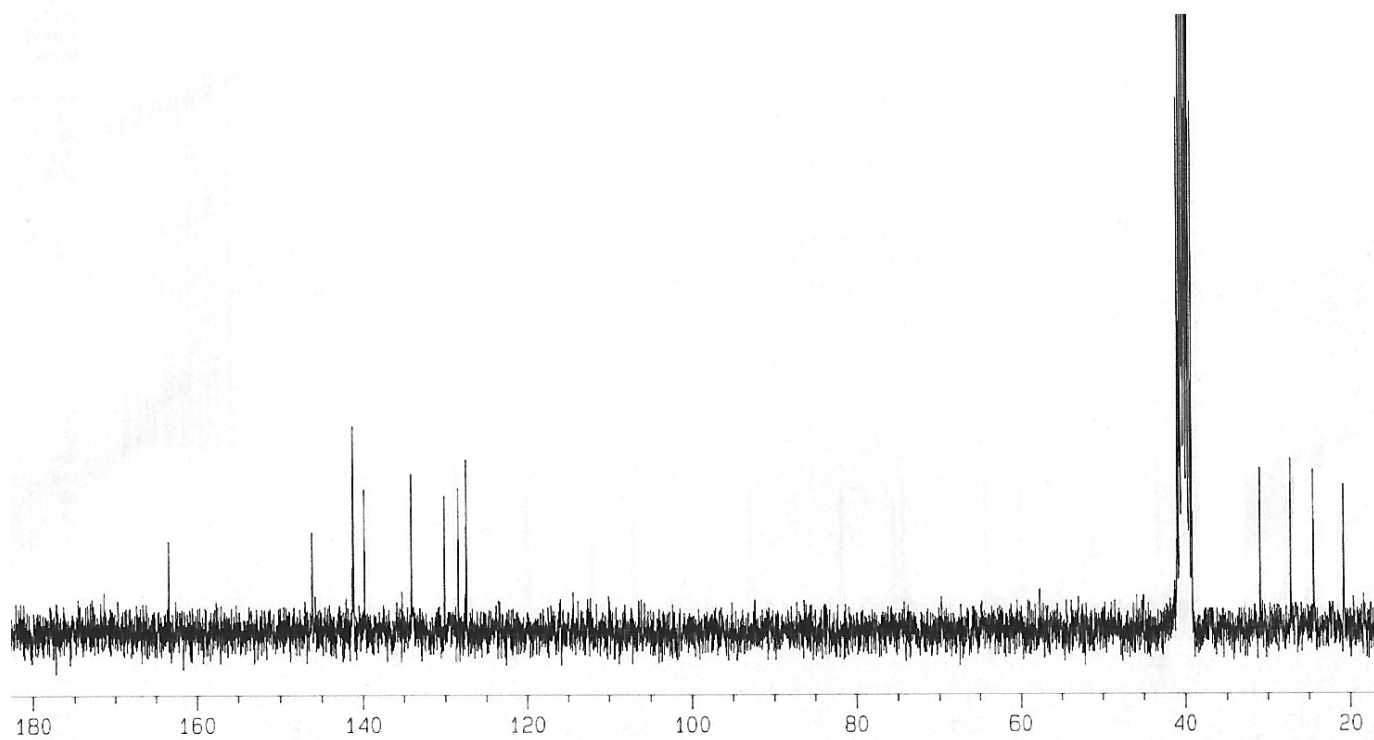

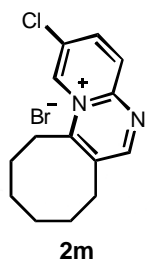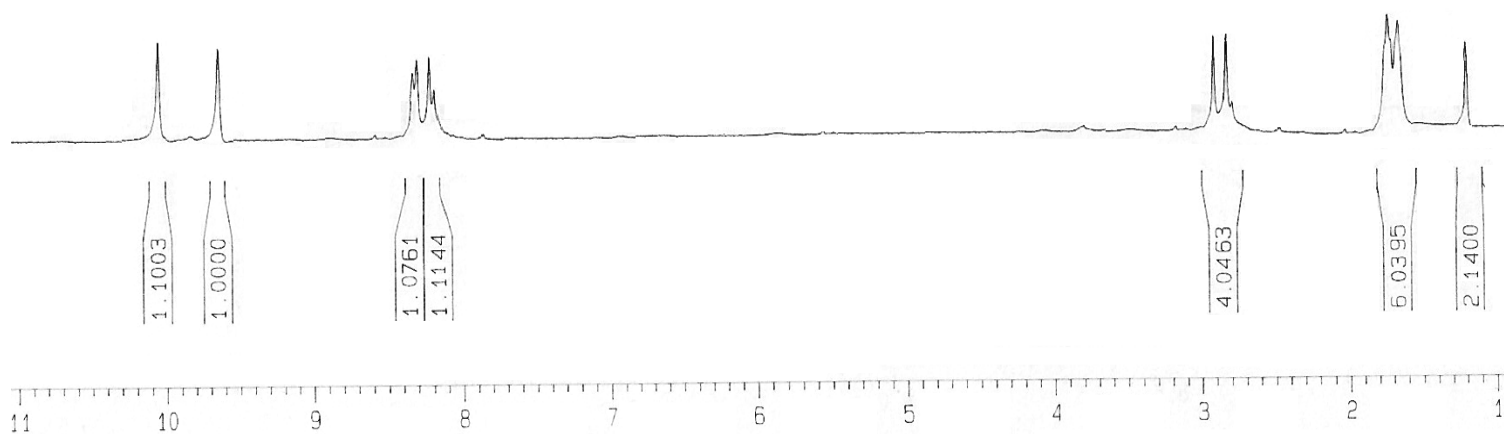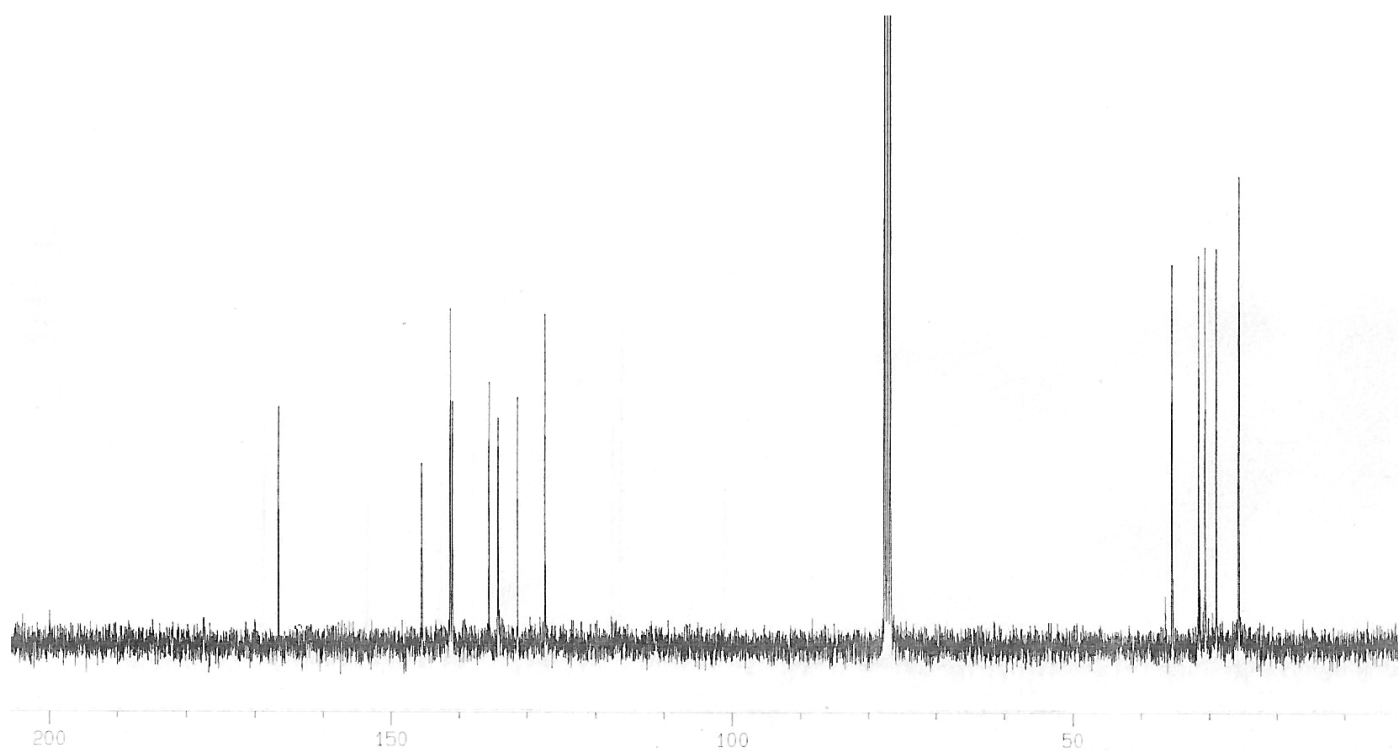

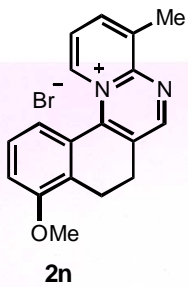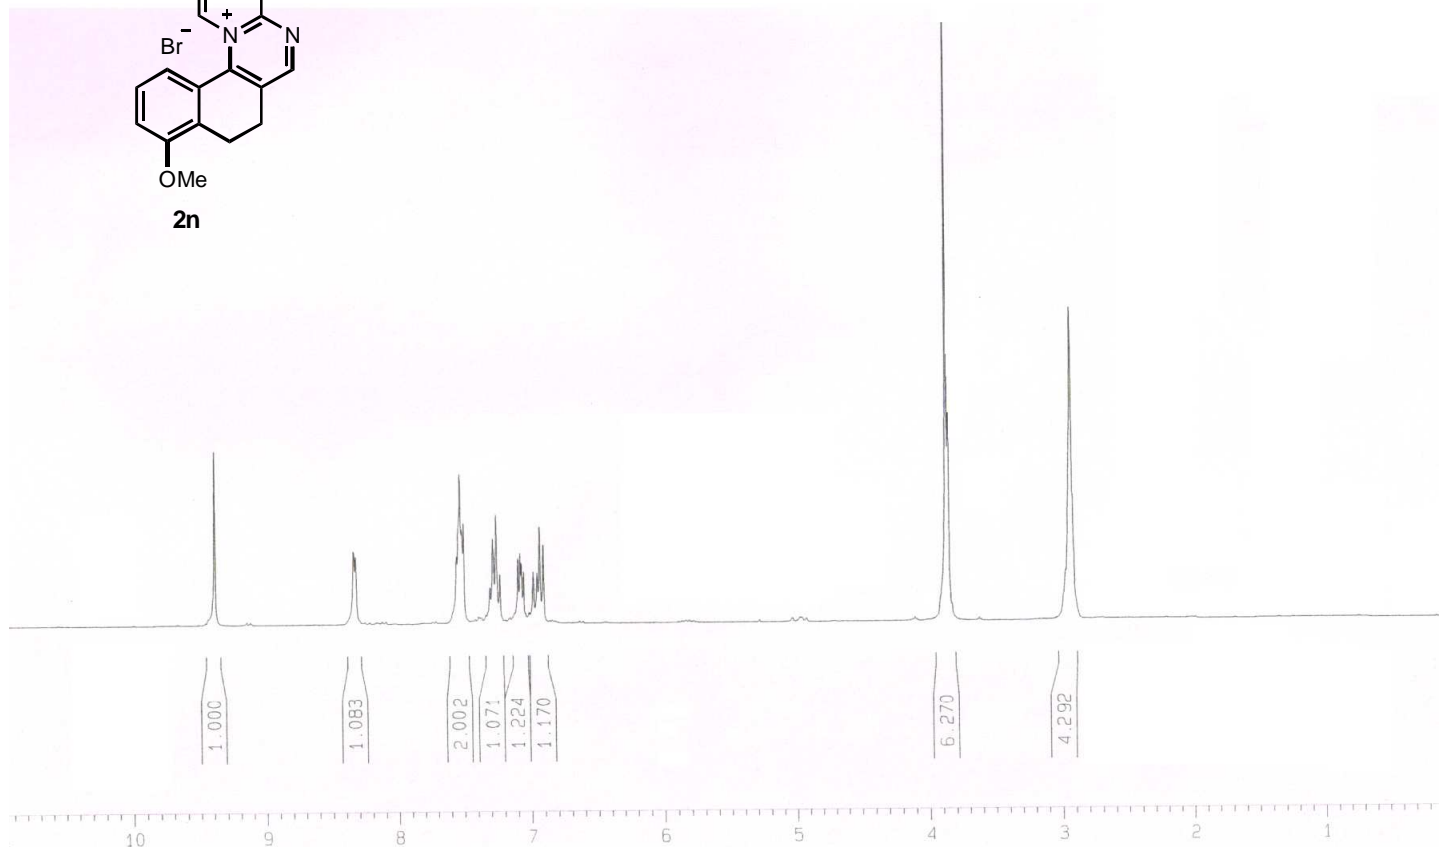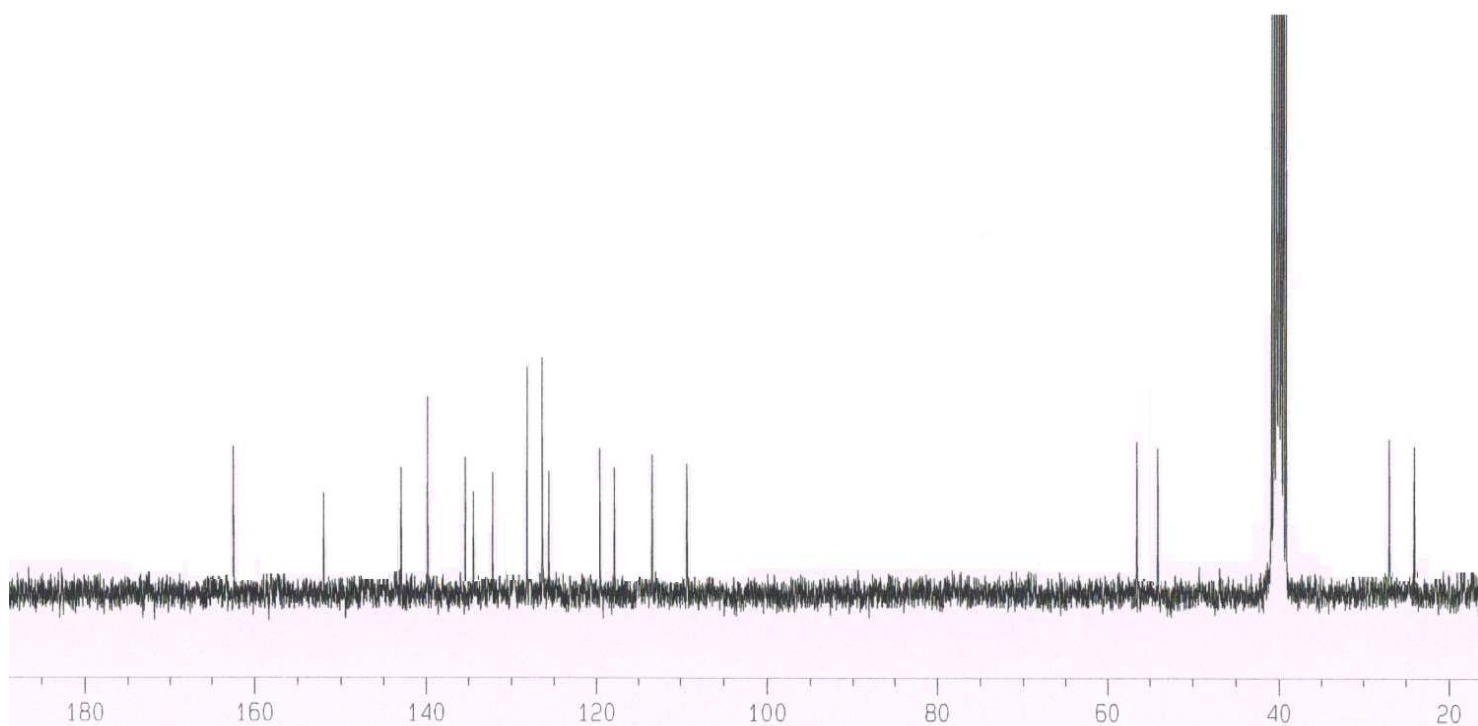

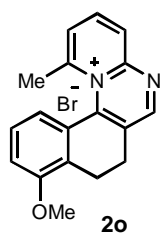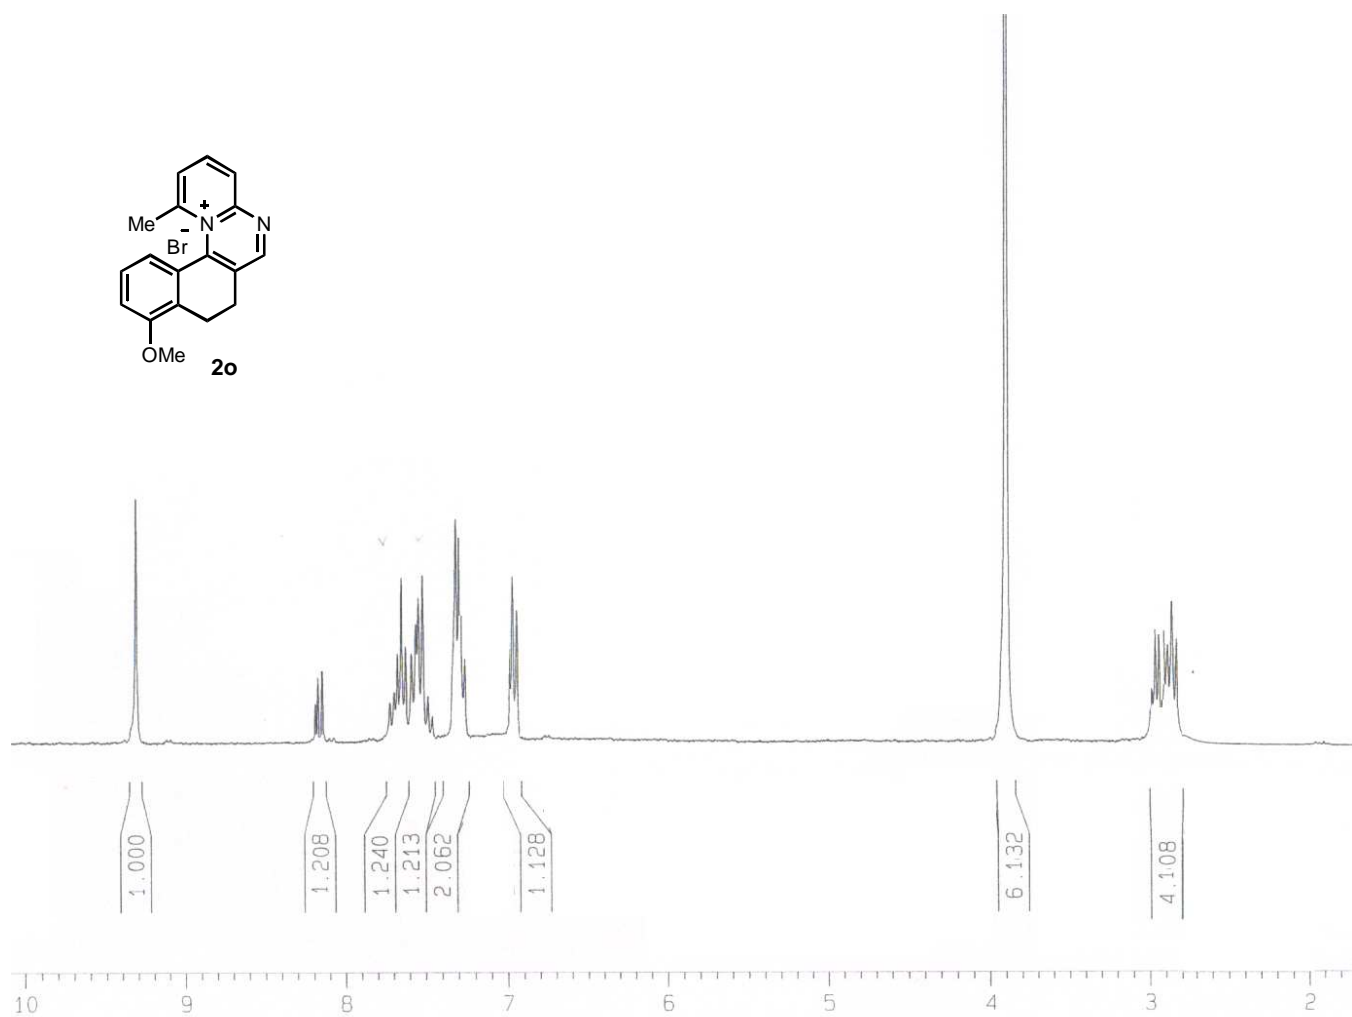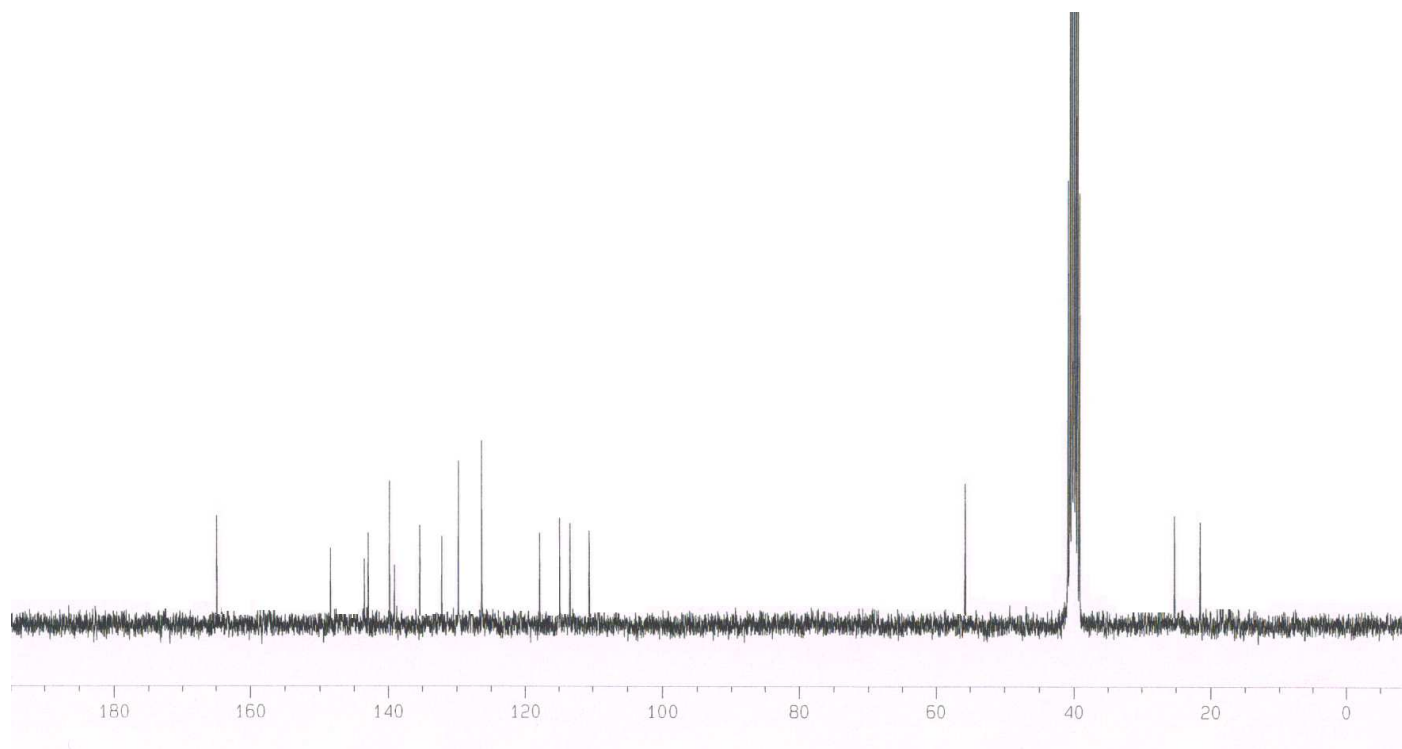

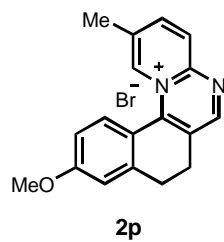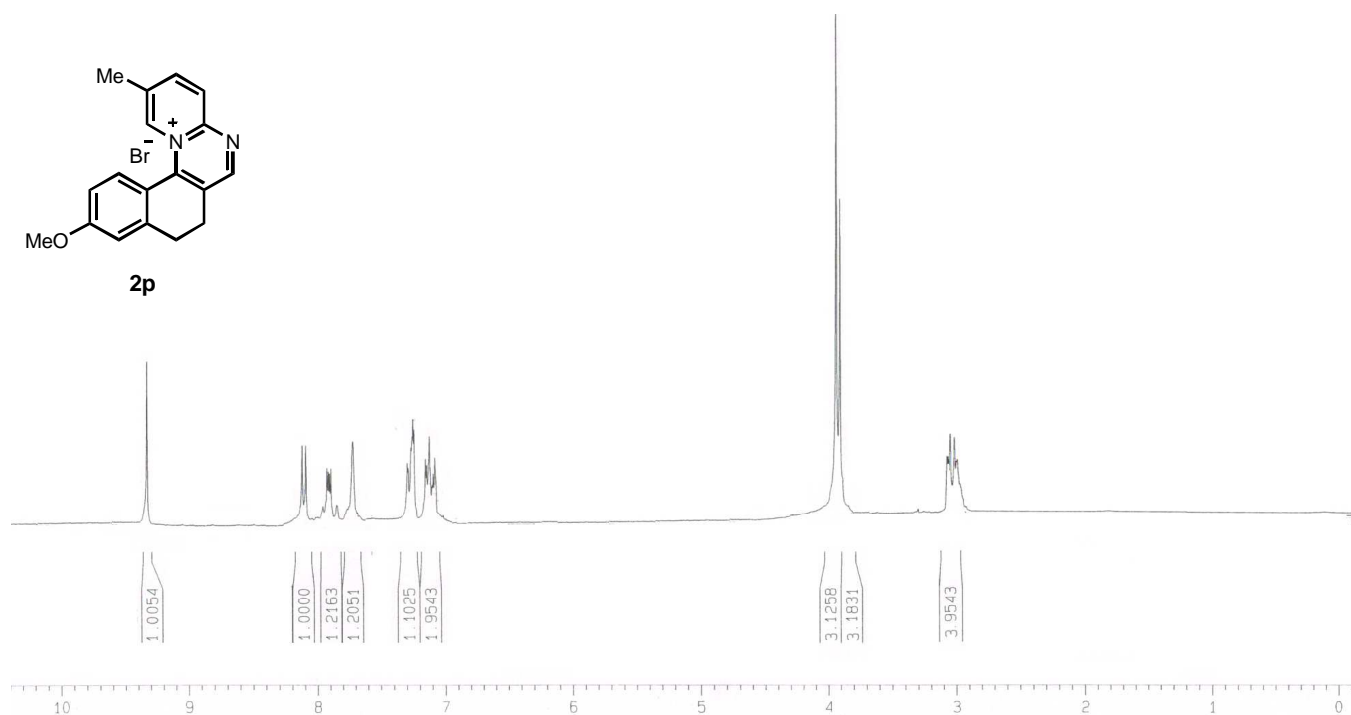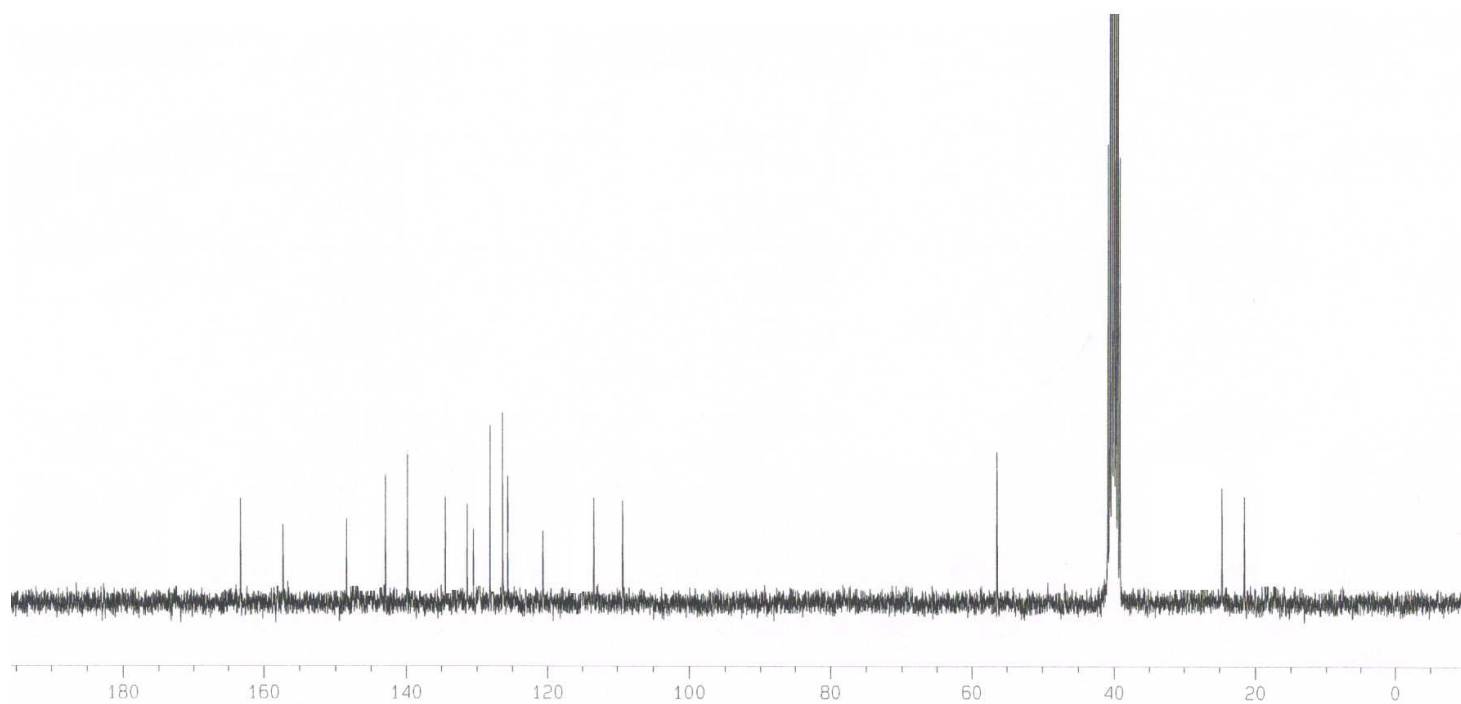

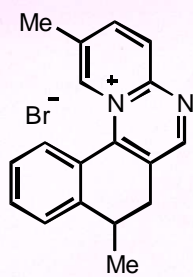

**2q**

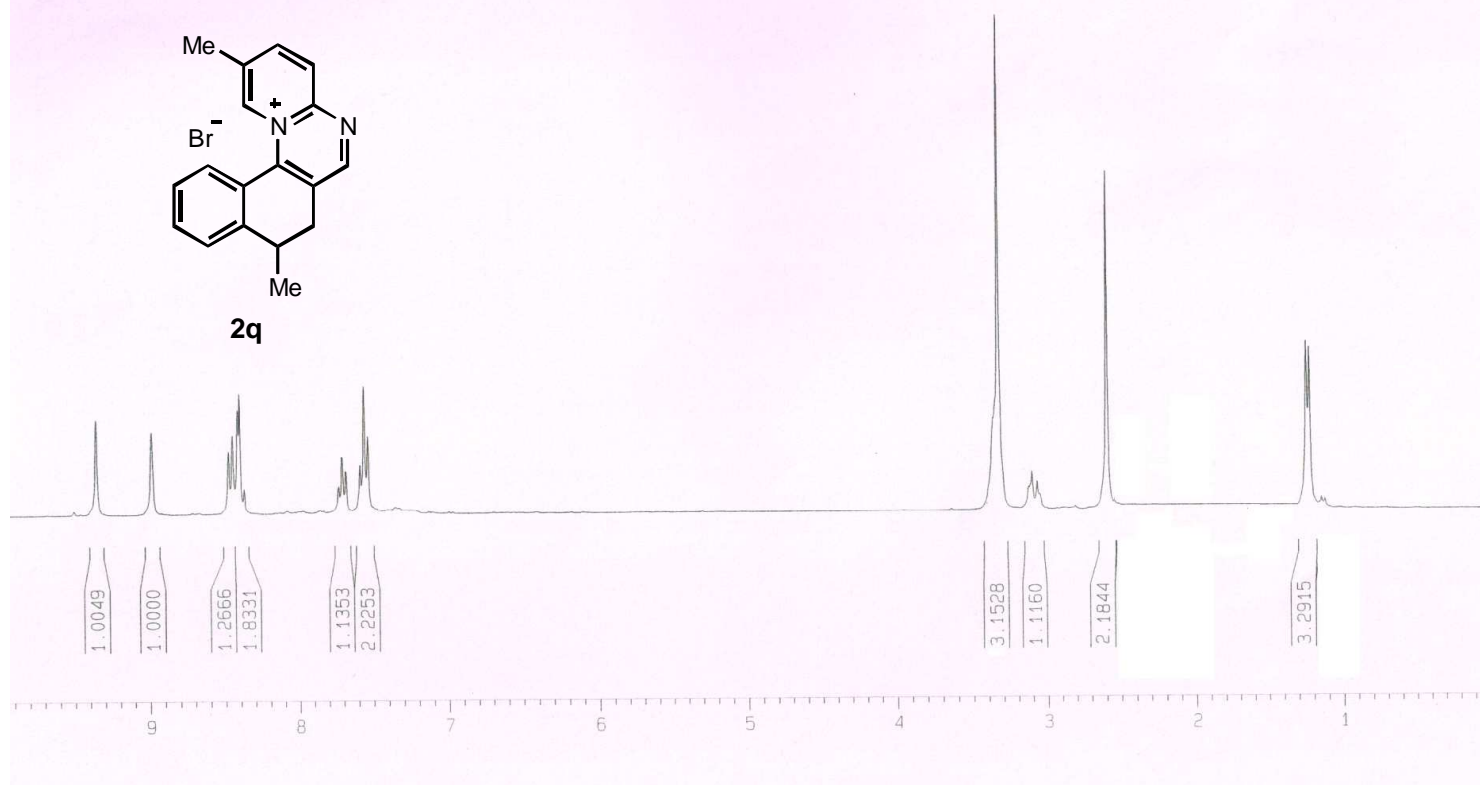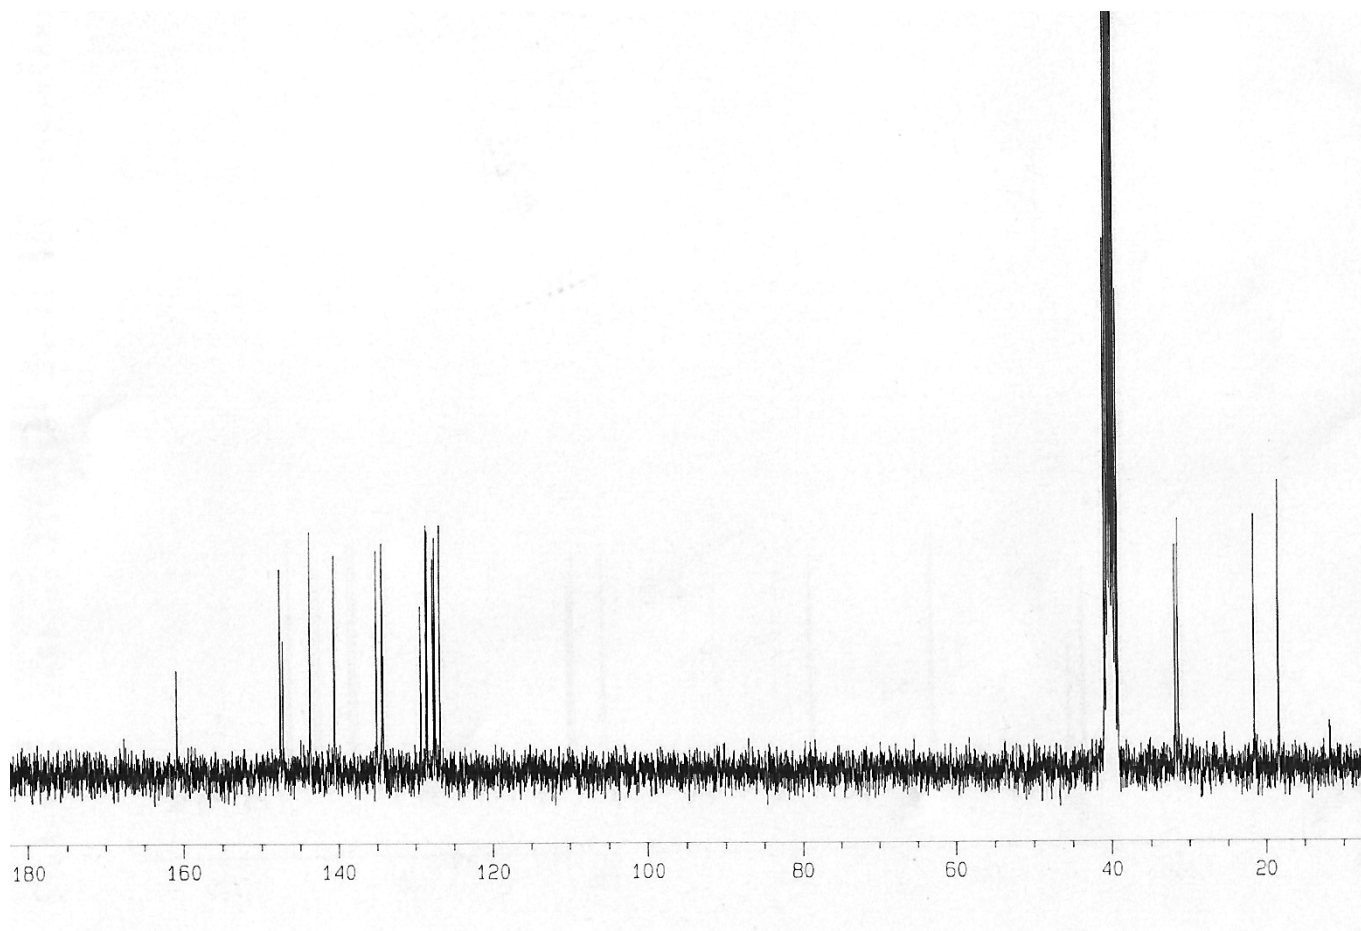



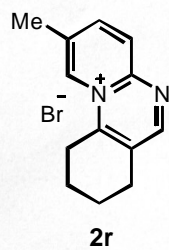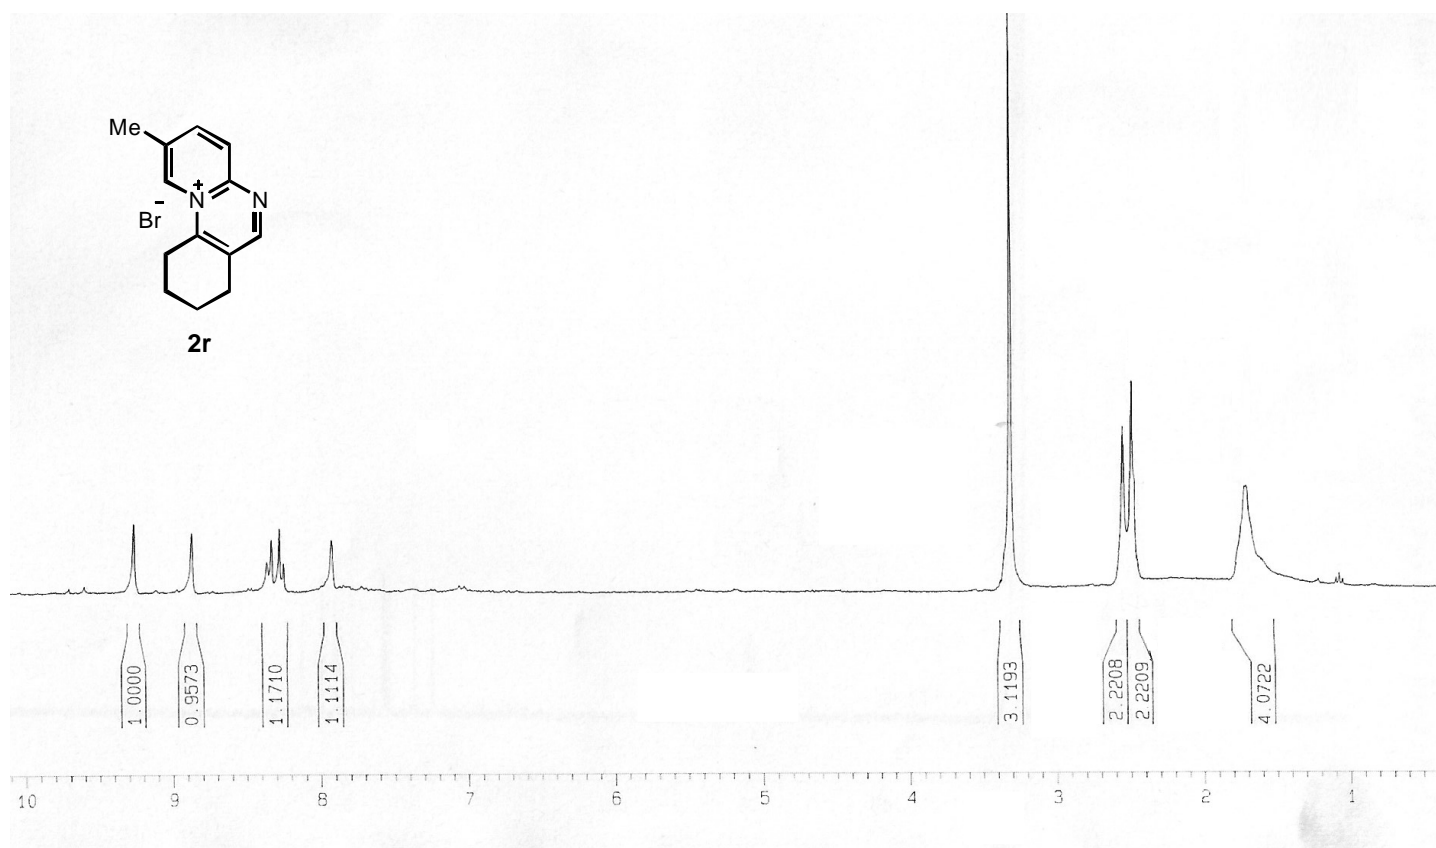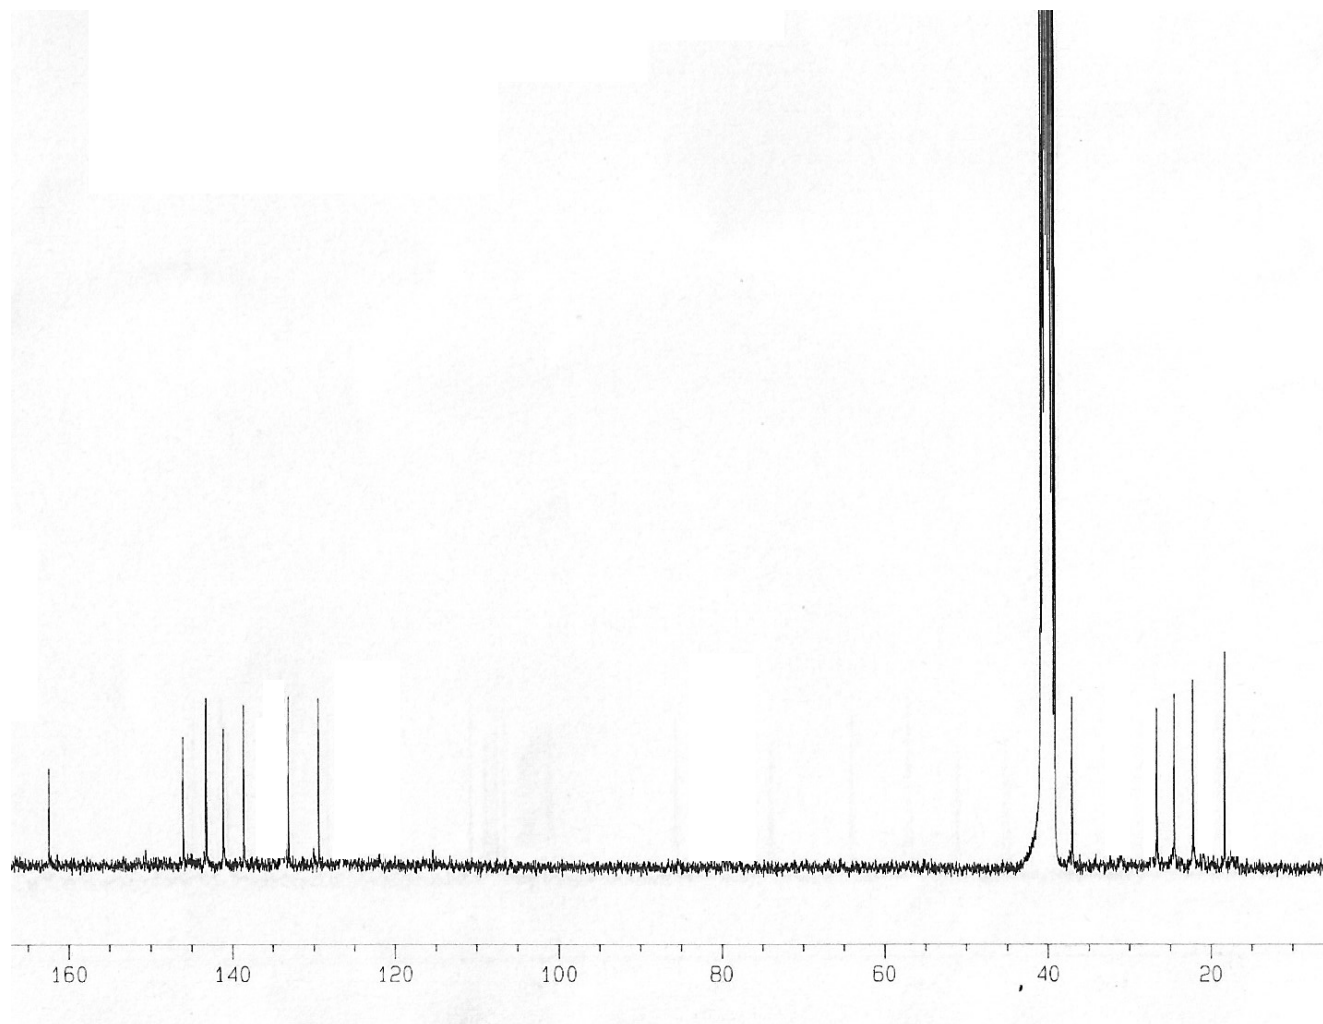

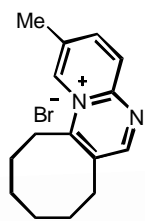

**2s**

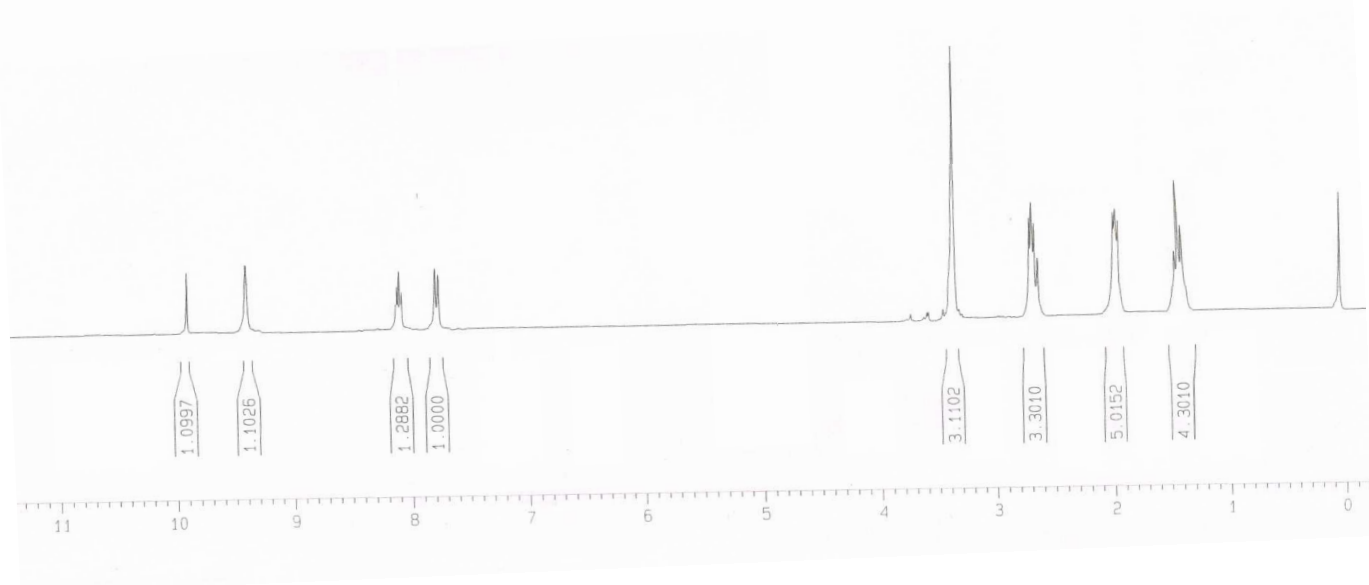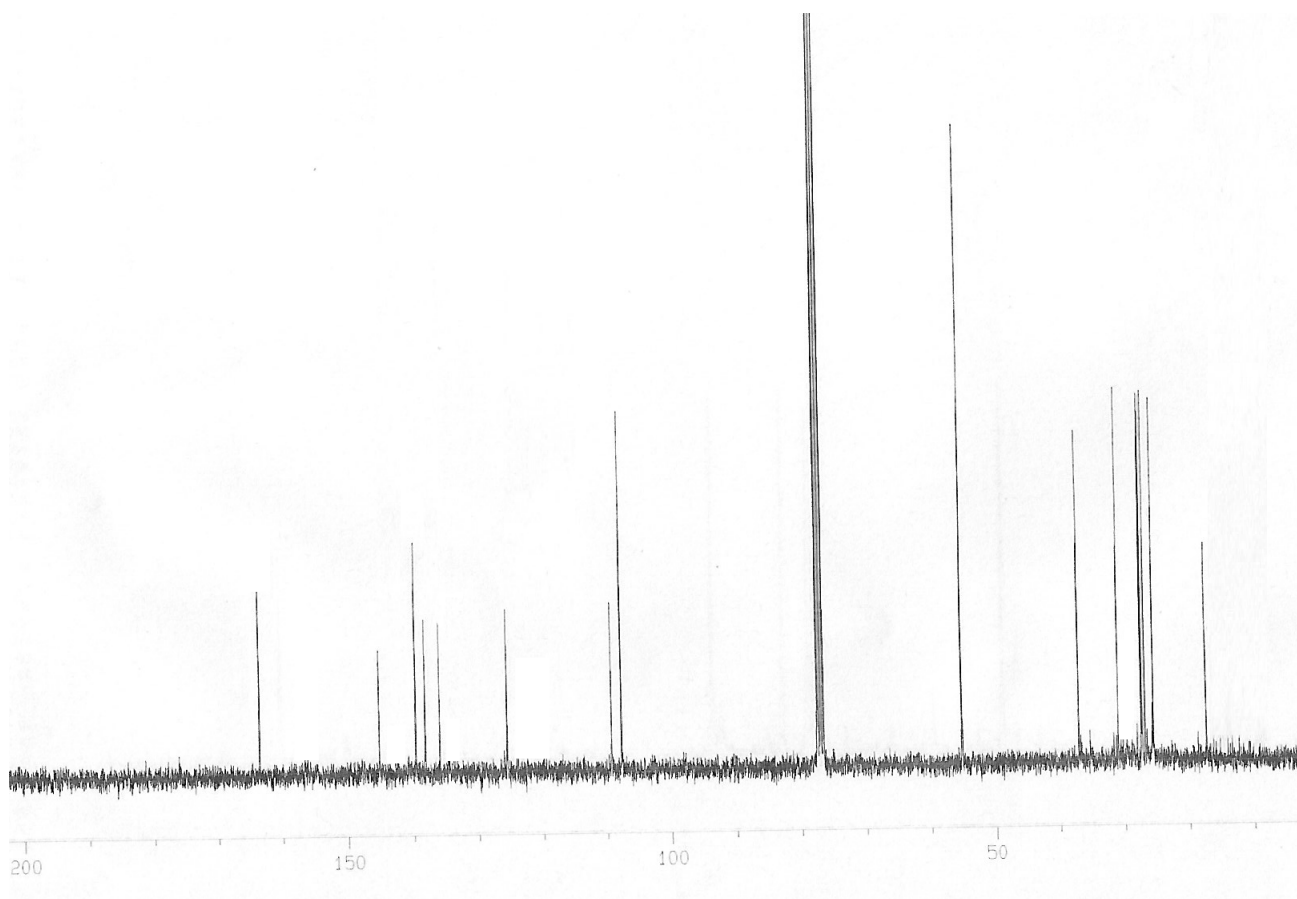

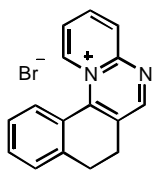

**2b**

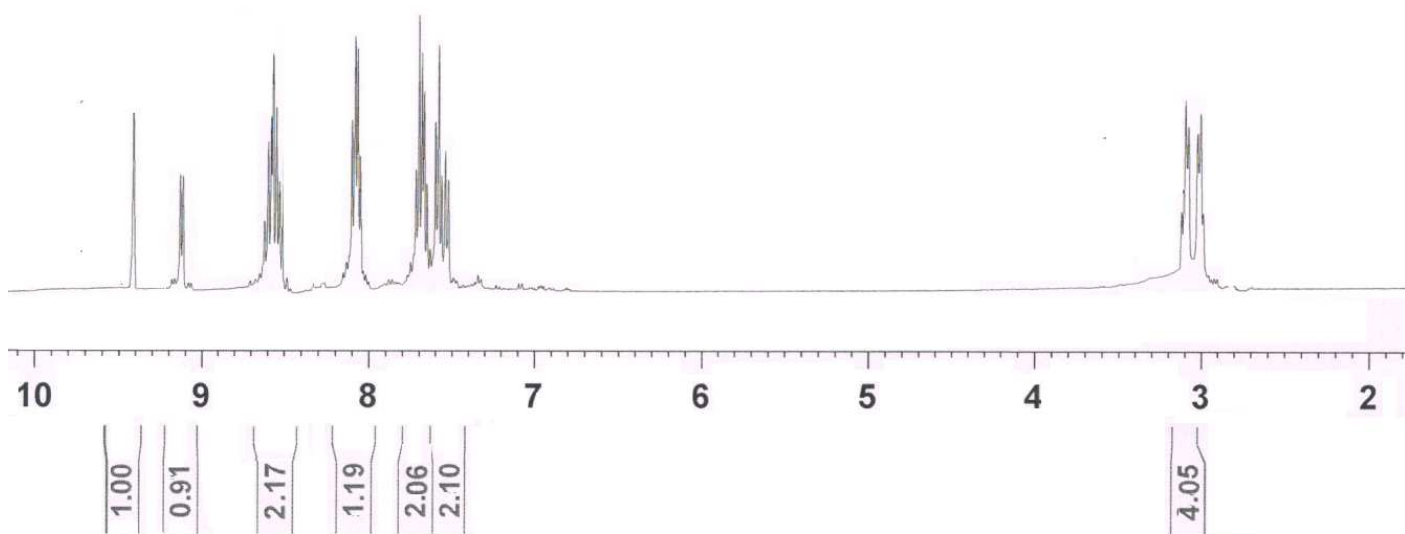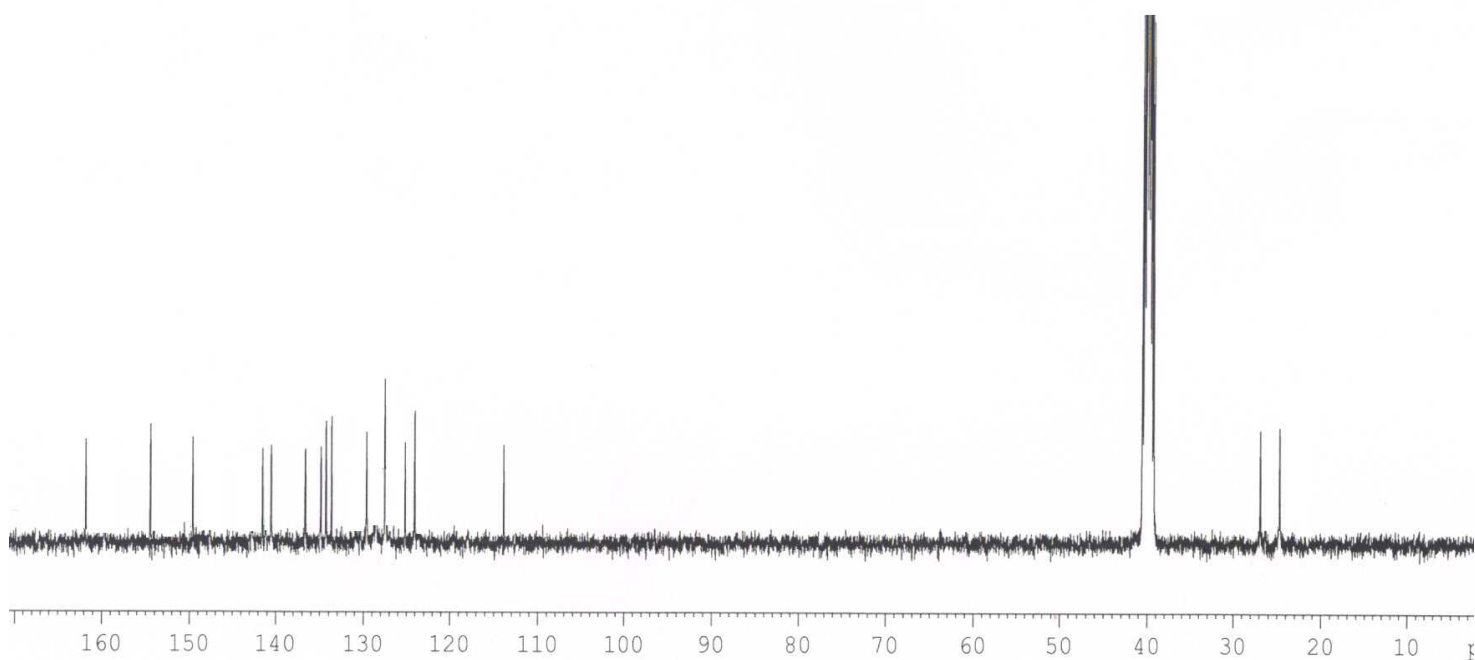

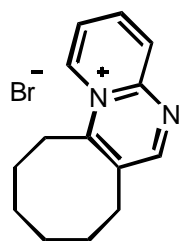

**2f**

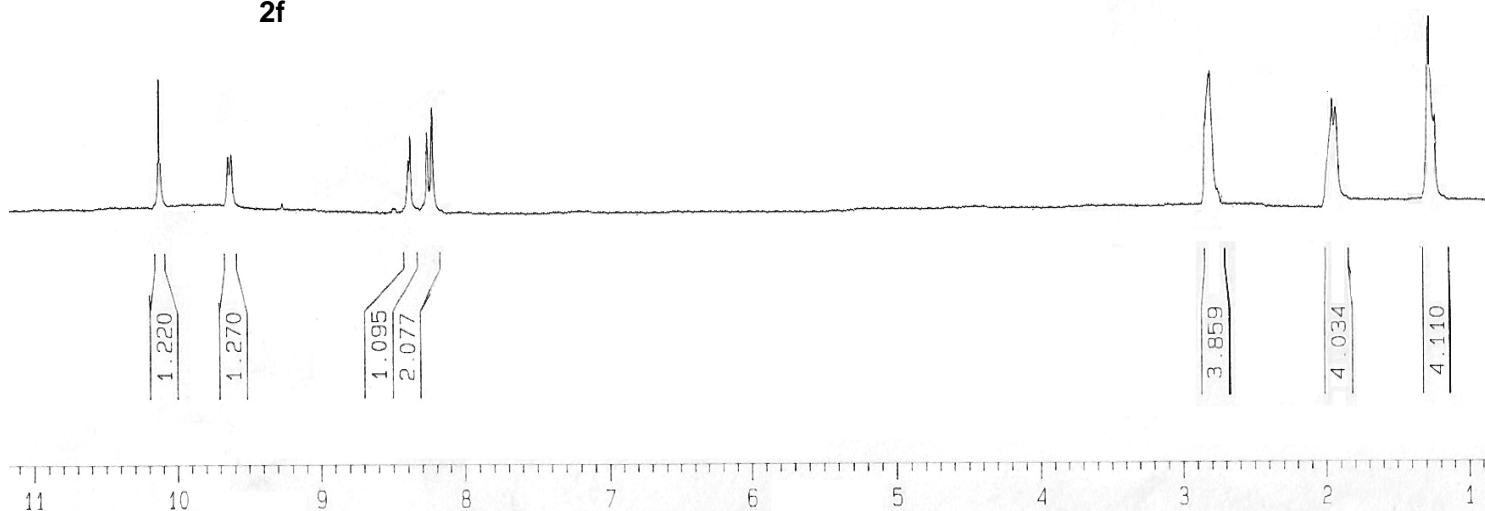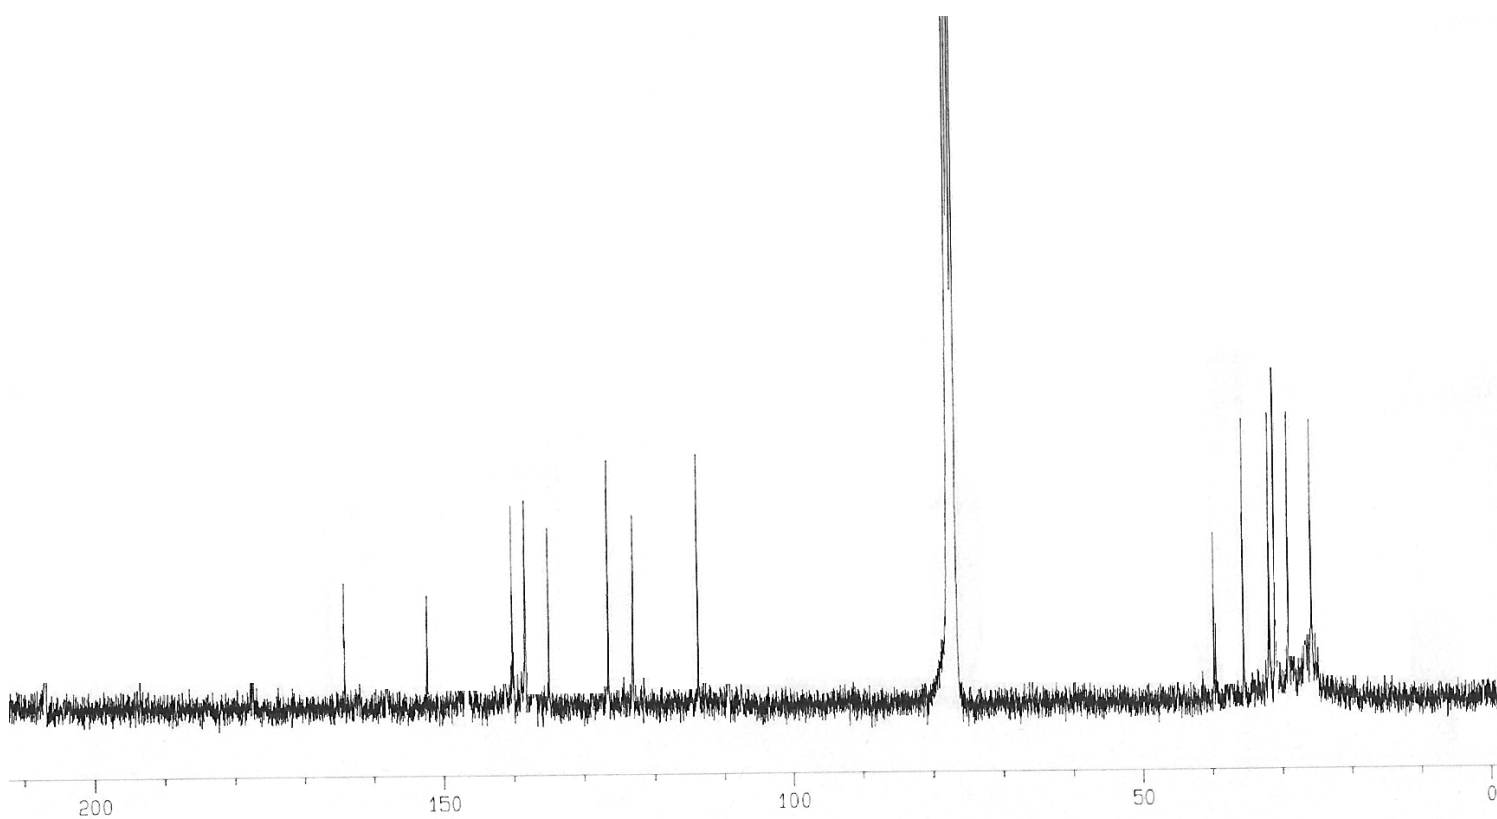

Supplement: c5ob01082a1.pdf [file c5ob01082a1.pdf]
